# Supplementary material
Source: PubMed Central journal article supplement (PMC7840310)
Supplement: Supp_Fig1.pdf [file Supp_Fig1.pdf]

A

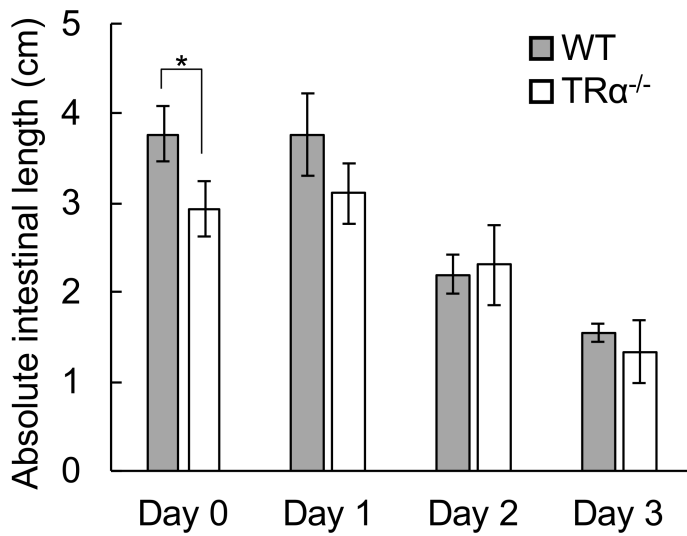

B

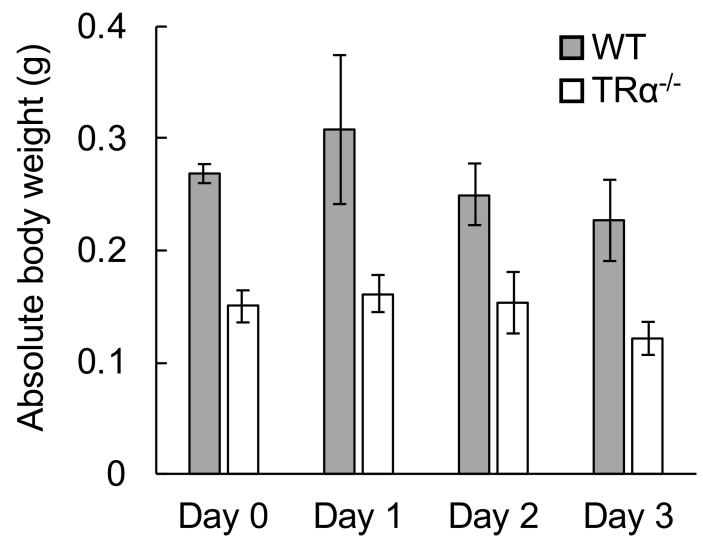

**Supplementary Fig. 1. The length of the intestine shortens while the body weight changes little during T3-induced metamorphosis.**

(A) The intestinal length during T3-induced metamorphosis. Tadpoles at stage 54 were treated with 10 nM T3 for up to 3 days. Intestinal length was measured from bile duct junction to colon. Each bar represents the mean plus S.D. The asterisk (\*) indicates a significant difference between TR $\alpha^{-/-}$  tadpoles and wild-type tadpoles ( $P < 0.05$ ).

(B) The body weight during T3-induced metamorphosis. The weight of each tadpole was measured before the intestine was isolated for measurement as shown in (A). Note that the body weight of both wild-type and TR $\alpha$  knockout tadpoles changed little during T3-induced metamorphosis, although the weight TR $\alpha$  knockout tadpoles was lighter than that of wild-type. Each bar represents the mean plus S.D.
