# Supplementary material
Source: PubMed Central journal article supplement (PMC7840310)
Supplement: Supp_Fig3.pdf [file Supp_Fig3.pdf]

**A**

RNA-seq

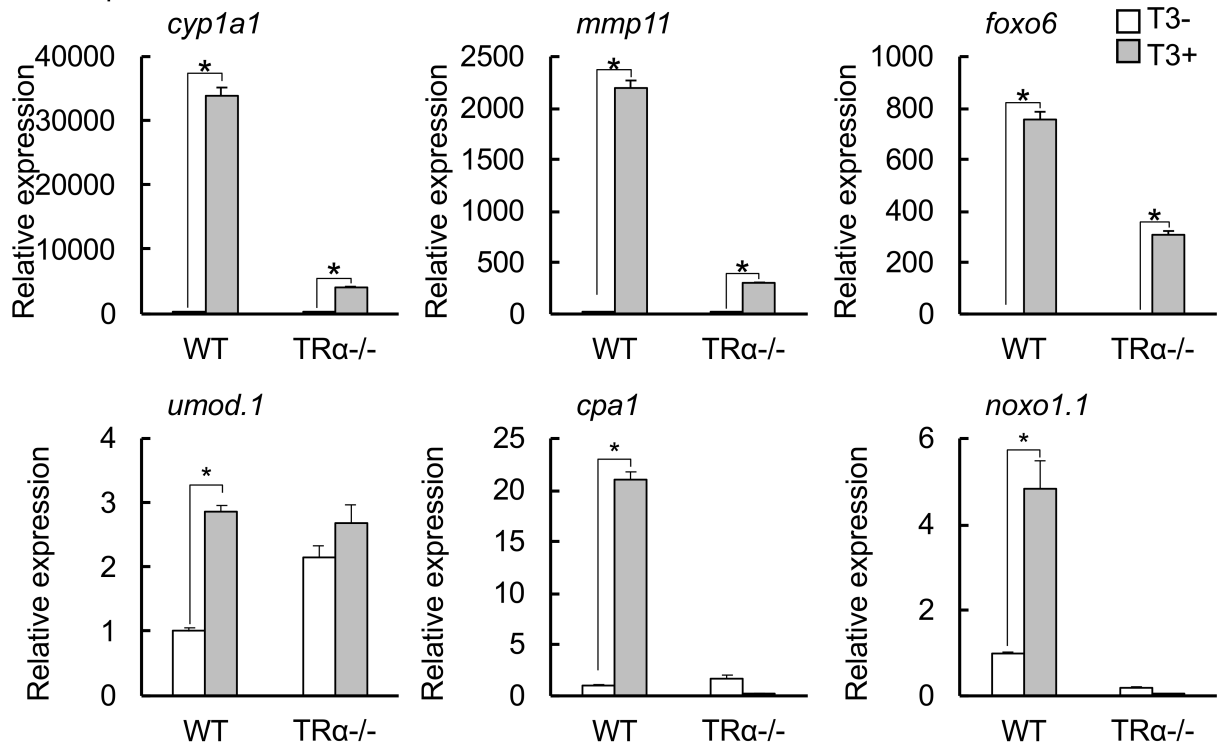**B**

qRT-PCR

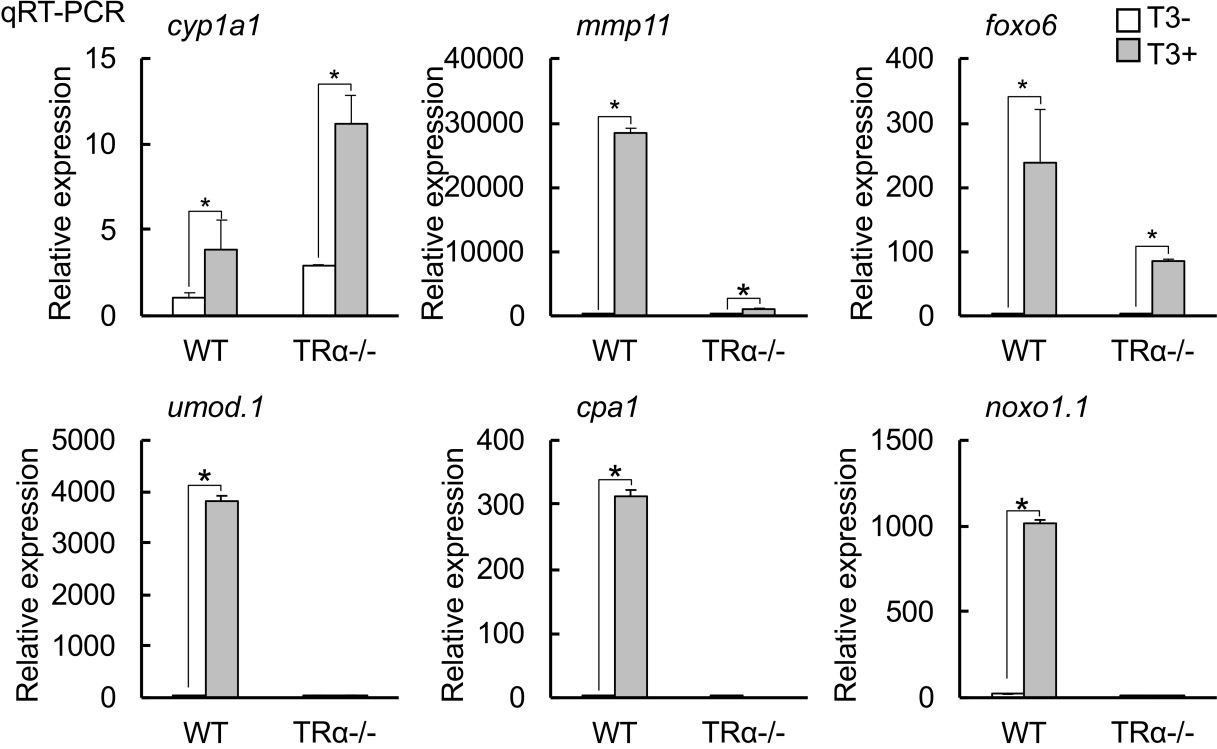\* $P < 0.05$ 

**Supplemental Figure 3. Independent confirmation of RNA-seq data by qRT-PCR data for selected genes.**

(A) Three genes (*cyp1a1*, *mmp11*, *foxo6*, Top) upregulated by T3 in both wild-type and  $TR\alpha^{-/-}$  tadpoles and three genes (*umod.1*, *cpa1* and *noxo1.1*, Bottom) upregulated by T3 only in wild type tadpoles as identified from RNA-seq. Each bar represents the mean plus S.E. and the asterisk (\*) indicates a significant difference between the T3- and T3+ samples ( $p < 0.05$ ).

(B) RT-PCR analyses confirms the regulation as found by RNA-seq for the 6 genes in (A). *X. tropicalis* tadpoles at stage 54 were treated with or without 10 nM T3 for 18 hours. RNA was isolated from the intestine and subjected to RT-PCR analysis for the 6 genes in (A). Note that the same regulation patterns were found for all genes as by RNA-seq (A). The asterisk (\*) indicates a significant difference between the T3- and T3+ samples ( $P < 0.05$ ). Each bar represents the mean plus S.E.
