# Supplementary material
Source: PubMed Central journal article supplement (PMC7840310)
Supplement: Supp_Table1.pdf [file Supp_Table1.pdf]

**Supplemental Table 1. Primer sequences**

| <i>Gene</i>    |    | Sequence                 |
|----------------|----|--------------------------|
| <i>casp3</i>   | Fw | AGCCCAAACACTATTCTTCATCCA |
|                | Re | GATGAACCAGGAACCATTTCATT  |
| <i>casp9</i>   | Fw | GAGGAGTTTACGGAACAGATGG   |
|                | Re | AGTCACCGAACATCCTTTGTCT   |
| <i>bax</i>     | Fw | CTGCAGAGGAGAATTGAGTGTG   |
|                | Re | CATGGTCCAGTTAATGATGGTG   |
| <i>mmp2</i>    | Fw | TAGAGCACTCTCAAGATCCTGGAG |
|                | Re | AGGTCCAGGACGTGGTTTTTCCTT |
| <i>mmp9-TH</i> | Fw | CTTTGTTCGATGGGTCCTCTGCT  |
|                | Re | ACGTTTCTGCATCCAGGTTG     |
| <i>mmp11</i>   | Fw | GGTTATGTGTGGCGCCTTCG     |
|                | Re | AATGGGAAAGGGCCCAGAGG     |
| <i>mmp13</i>   | Fw | TTCTAGCTCATGCCTTTGCTCCAG |
|                | Re | TAGAGTGGTCTAATCCCAGCGAGT |
| <i>mmp14</i>   | Fw | TGGAGATTTGCGGACACACACCTT |
|                | Re | ATTTGTCAGGGACTCCACATCGAG |
| <i>thibz</i>   | Fw | CCAAGGGAAACGGGTGGCTT     |
|                | Re | GTGCCACCTCTGCGGAAAGT     |
| <i>thrb</i>    | Fw | CTCTAGCAGCTGATGGTGGG     |
|                | Re | TGGGTTTTGTTTCCTGGTGCT    |
| <i>lgr5</i>    | Fw | GGAACCTCAGCATCTTCACG     |
|                | Re | AGCTCCTCTAAGAAGTGCAGG    |
| <i>cyp1a1</i>  | Fw | TTGTGGTACTGCTGGCTTTG     |
|                | Re | GGGAGTTTGACCCTTTGTGA     |
| <i>foxo6</i>   | Fw | GGAGAAGTTGGACGCTGAAT     |
|                | Re | GACAAGGTCAGTCGCCTCTC     |
| <i>umod.2</i>  | Fw | CCGCTCCAACCTGATGGTATT    |
|                | Re | AGGGGCACATAAGCATTAC      |
| <i>cpa1</i>    | Fw | CGATGAGCTGAATGCTGTGT     |
|                | Re | CCAGTATCACGCAGCTCAA      |
| <i>noxo1.1</i> | Fw | GCCTTACGTGGTGGGTCTAA     |
|                | Re | TGGGCAGATGCTCTTCTCTT     |
| <i>rpl8</i>    | Fw | TTGCCAAGGTTGCTTTCCG      |
|                | Re | GTTTCAGGATTGTGGGAGATAACG |
