# Supplementary material
Source: PubMed Central journal article supplement (PMC7840310)
Supplement: Supp_Table2.pdf [file Supp_Table2.pdf]

|     |                   |            |            |                    |                 |                   |
|-----|-------------------|------------|------------|--------------------|-----------------|-------------------|
| 202 | ENSGT00000002972  | 1.02428896 | 5.58E-11   | 58882              | PP3H7 (aa)      | ENSG00000129149   |
| 203 | ENSGT00000004861  | 1.02418131 | 2.53E-10   | 68854              | iodic domain    | ENSG00000149763   |
| 204 | ENSGT00000002773  | 1.02079423 | 0.00047973 | 4941               | zinc finger     | ENSG00000200971   |
| 205 | ENSGT00000001028  | 1.02012171 | 1.39E-10   | 63853              | phosphatase     | ENSG00000181849   |
| 206 | ENSGT000000014281 | 1.02072934 | 5.75E-11   | 4941               | zinc finger     | ENSG00000181794   |
| 207 | ENSGT000000012877 | 1.02048812 | 1.15E-10   | 64788              | PDZ-like domain | ENSG00000180845   |
| 208 | ENSGT00000001114  | 1.02048845 | 5.17E-10   | 68923              | zinc-like fold  | ENSG00000160413   |
| 209 | ENSGT00000000820  | 1.00857123 | 1.19E-10   | 68862              | chromograin     | ENSG00000180846   |
| 210 | ENSGT00000000244  | 1.00518872 | 1.10E-10   | 62613              | zinc domain     | ENSG00000151997   |
| 211 | ENSGT00000002274  | 1.00818833 | 6.50E-10   | 5946               | zinc acid CoA   | ENSG00000130883   |
| 212 | ENSGT00000001974  | 1.00789548 | 2.71E-10   | 68813              | 1-proteinase    | ENSG00000130979   |
| 213 | ENSGT00000000110  | 1.00213111 | 1.20E-10   | 68846              | zinc            | ENSG00000190767   |
| 214 | ENSGT00000001291  | 1.00213111 | 2.00E-10   | 68846              | zinc            | ENSG00000140416   |
| 215 | ENSGT000000011592 | 1.11588938 | 0.00213170 | 48-5ENE_S142161    | zinc metallo    | ENSG00000121793   |
| 216 | ENSGT000000012024 | 1.11545268 | 6.88E-10   | 6021               | RNA3            | ENSG00000123246   |
| 217 | ENSGT00000000976  | 1.11540941 | 1.10E-10   | 6021               | RNA32           | ENSG00000124163   |
| 218 | ENSGT00000001252  | 1.11537197 | 0.00213171 | 6021               | RNA3            | ENSG00000121794   |
| 219 | ENSGT000000002744 | 1.11516284 | 5.18E-11   | 6042               | TP22            | ENSG0000012008163 |
| 220 | ENSGT000000001166 | 1.14063446 | 6.08E-10   | 48176              | RNA378          | ENSG00000100153   |
| 221 | ENSGT000000022215 | 1.14057743 | 6.75E-10   | 49412              | ATPase domain   | ENSG00000159882   |
| 222 | ENSGT000000012493 | 1.13680301 | 4.76E-10   | 49412              | zinc metallo    | ENSG00000121845   |
| 223 | ENSGT000000021242 | 1.13518444 | 6.71E-10   | 45148              | zinc metallo    | ENSG00000124870   |
| 224 | ENSGT000000014881 | 1.13497313 | 1.10E-10   | 6021               | zinc metallo    | ENSG00000121564   |
| 225 | ENSGT000000010116 | 1.11109103 | 1.63E-10   | 6042               | zinc metallo    | ENSG00000124840   |
| 226 | ENSGT000000000287 | 1.1492509  | 1.87E-10   | 6042               | RNA3            | ENSG00000124678   |
| 227 | ENSGT000000012213 | 1.12197732 | 0.00213170 | 49412              | RNA3            | ENSG00000120020   |
| 228 | ENSGT000000013072 | 1.10179172 | 5.0E-10    | 6042               | RNA3            | ENSG00000121848   |
| 229 | ENSGT000000004189 | 1.11781809 | 0.00213168 | 49412              | RNA32           | ENSG00000100999   |
| 230 | ENSGT000000021222 | 1.11776788 | 1.42E-10   | 49412              | zinc metallo    | ENSG00000121718   |
| 231 | ENSGT000000006112 | 1.11714974 | 4.44E-10   | 6042               | zinc metallo    | ENSG00000121402   |
| 232 | ENSGT000000018291 | 1.11483113 | 3.61E-10   | 6042               | zinc metallo    | ENSG00000121848   |
| 233 | ENSGT000000019823 | 1.11139548 | 6.50E-10   | 6042               | zinc metallo    | ENSG00000121848   |
| 234 | ENSGT000000011070 | 1.10128103 | 0.00666071 | 24911              | zinc metallo    | ENSG00000121835   |
| 235 | ENSGT000000008124 | 1.10128103 | 0.00666071 | 24911              | zinc metallo    | ENSG00000121835   |
| 236 | ENSGT000000018609 | 1.10117838 | 8.03E-11   | 24911              | zinc metallo    | ENSG00000121824   |
| 237 | ENSGT000000011244 | 1.09995717 | 0.01170843 | 6042               | RNA3            | ENSG00000115991   |
| 238 | ENSGT000000011443 | 1.09762832 | 1.05E-10   | 49412              | 4-hydroxy-2     | ENSG00000121855   |
| 239 | ENSGT000000011443 | 1.09697172 | 0.01242836 | 6042               | zinc metallo    | ENSG00000121849   |
| 240 | ENSGT000000009428 | 1.09631487 | 0.01380270 | ENSGT000000002648  | zinc metallo    | ENSG00000121790   |
| 241 | ENSGT000000012064 | 1.09172624 | 0.001      | 6042               | zinc metallo    | ENSG00000110421   |
| 242 | ENSGT000000011472 | 1.09074708 | 1.73E-11   | ENSGT000000014772  | zinc metallo    | ENSG00000115477   |
| 243 | ENSGT000000019708 | 1.08816832 | 2.41E-10   | 6042               | MS18 domain     | ENSG00000121834   |
| 244 | ENSGT000000009213 | 1.08696704 | 1.10E-10   | 6042               | zinc metallo    | ENSG00000121837   |
| 245 | ENSGT000000008872 | 1.08414824 | 7.17E-10   | 6042               | zinc metallo    | ENSG00000121876   |
| 246 | ENSGT00000000208  | 1.08207887 | 1.70E-10   | 6042               | zinc metallo    | ENSG00000121818   |
| 247 | ENSGT000000012011 | 1.07510709 | 0.01000820 | 20427              | RNA3            | ENSG00000121842   |
| 248 | ENSGT000000011212 | 1.07128471 | 1.0E-10    | 6042               | zinc metallo    | ENSG00000121839   |
| 249 | ENSGT000000021244 | 1.06658000 | 0.00213165 | 6042               | RNA3            | ENSG00000121480   |
| 250 | ENSGT000000011274 | 1.06367878 | 0.00414140 | 6042               | zinc metallo    | ENSG00000121788   |
| 251 | ENSGT000000018881 | 1.05914418 | 0.01241215 | 15153              | zinc metallo    | ENSG00000121893   |
| 252 | ENSGT000000009971 | 1.05740517 | 0.00205499 | 6042               | zinc metallo    | ENSG00000121899   |
| 253 | ENSGT000000012188 | 1.05706068 | 0.00207758 | 6042               | zinc metallo    | ENSG00000121897   |
| 254 | ENSGT000000005188 | 1.05425076 | 1.10E-10   | 6042               | zinc metallo    | ENSG00000121838   |
| 255 | ENSGT000000011884 | 1.05162468 | 0.01818428 | 6042               | zinc metallo    | ENSG00000100121   |
| 256 | ENSGT000000003021 | 1.05148860 | 0.00297977 | ENSGT000000002111  | zinc metallo    | ENSG00000121790   |
| 257 | ENSGT000000011213 | 1.05095151 | 1.0E-10    | 6042               | zinc metallo    | ENSG00000121799   |
| 258 | ENSGT000000011590 | 1.04884862 | 0.01137271 | 6042               | zinc metallo    | ENSG00000121847   |
| 259 | ENSGT000000012229 | 1.04872138 | 1.0E-10    | 6042               | zinc metallo    | ENSG00000121849   |
| 260 | ENSGT000000014840 | 1.04686833 | 0.00330007 | 49412              | zinc finger     | ENSG00000121244   |
| 261 | ENSGT000000000004 | 1.04681188 | 6.0E-10    | zinc metallo       | zinc metallo    | ENSG00000121886   |
| 262 | ENSGT000000012413 | 1.03971134 | 0.0130987  | 6042               | zinc metallo    | ENSG00000121877   |
| 263 | ENSGT000000029913 | 1.03800232 | 2.73E-10   | ENSGT0000000029913 | zinc metallo    | ENSG00000121886   |
| 264 | ENSGT000000018272 | 1.03745104 | 1.10E-10   | 6042               | zinc metallo    | ENSG00000121874   |
| 265 | ENSGT000000020676 | 1.03621495 | 1.10E-10   | 6042               | zinc metallo    | ENSG00000121795   |
| 266 | ENSGT000000021229 | 1.03588818 | 1.10E-10   | 6042               | zinc metallo    | ENSG00000121874   |
| 267 | ENSGT000000018212 | 1.03478804 | 0.01744601 | 6042               | zinc metallo    | ENSG00000121871   |
| 268 | ENSGT000000018816 | 1.03191108 | 0.01214718 | 6042               | zinc metallo    | ENSG00000121846   |
| 269 | ENSGT000000016497 | 1.02788818 | 0.010E-10  | 6042               | zinc metallo    | ENSG00000121678   |
| 270 | ENSGT000000012409 | 1.02522038 | 1.10E-10   | 6042               | zinc metallo    | ENSG00000121878   |
| 271 | ENSGT000000012074 | 1.02000000 | 1.10E-10   | 6042               | zinc metallo    | ENSG00000121888   |
| 272 | ENSGT000000012112 | 1.01807549 | 2.00E-10   | 6042               | zinc metallo    | ENSG00000121899   |
| 273 | ENSGT000000009912 | 1.01798112 | 0.01789597 | 13163              | zinc metallo    | ENSG00000121849   |
| 274 | ENSGT000000011883 | 1.01601824 | 0.01855688 | 6042               | zinc metallo    | ENSG00000121029   |
| 275 | ENSGT000000004811 | 1.00895146 | 0.01814518 | 6042               | zinc metallo    | ENSG00000121874   |
| 276 | ENSGT000000007784 | 1.00884737 | 0.04E-10   | 6042               | zinc metallo    | ENSG00000121827   |
| 277 | ENSGT000000011118 | 1.00709132 | 1.10E-10   | 6042               | zinc metallo    | ENSG00000121874   |
| 278 | ENSGT000000004172 | 1.00637782 | 1.42E-10   | 6042               | zinc metallo    | ENSG00000121871   |
| 279 | ENSGT000000008828 | 1.00421272 | 1.0E-10    | 6042               | zinc metallo    | ENSG00000121794   |
| 280 | ENSGT000000006534 | 1.00397845 | 0.00292846 | 6042               | T-box 1         | ENSG00000121858   |
| 281 | ENSGT000000018188 | 1.00396188 | 0.02910401 | 6042               | zinc metallo    | ENSG00000121890   |

ENSG0000012644,ENSG0000012651,ENSG00000181847,ENSG00000182954,ENSG00000154451,ENSG0000017728

Supplemental Table 26. Genes with at least 2 fold change in expression in T3-treated TH knock-out tadpoles compared to wild type embryos.

| 2 fold change (DOWN) |                |           | 2 fold change (UP) |                  |                |           |                  |
|----------------------|----------------|-----------|--------------------|------------------|----------------|-----------|------------------|
| Gene ID              | log2FC(Change) | Gene Name | Ensembl ID         | Gene ID          | log2FC(Change) | Gene Name | Ensembl ID       |
| ENSG000000000001     | -1.4531884     | 4.81E-07  | acta1              | ENSG000000000001 | 1.9120055      | acta1     | ENSG000000000001 |
| ENSG000000000002     | -1.5445488     | 1.34E-17  | carboxyl-act       | ENSG000000000002 | 1.9420147      | acta1     | ENSG000000000001 |
| ENSG000000000003     | -1.5559103     | 8.81E-13  | acta1              | ENSG000000000003 | 1.9722328      | acta1     | ENSG000000000001 |
| ENSG000000000004     | -1.5685705     | 3.81E-13  | acta1              | ENSG000000000004 | 1.9851947      | acta1     | ENSG000000000001 |
| ENSG000000000005     | -1.5737103     | 1.05E-11  | acta1              | ENSG000000000005 | 1.9955552      | acta1     | ENSG000000000001 |
| ENSG000000000006     | -1.5815049     | 1.21E-15  | acta1              | ENSG000000000006 | 2.0013020      | acta1     | ENSG000000000001 |
| ENSG000000000007     | -1.5844131     | 5.48E-11  | acta1              | ENSG000000000007 | 2.0072747      | acta1     | ENSG000000000001 |
| ENSG000000000008     | -1.5872213     | 1.41E-11  | acta1              | ENSG000000000008 | 2.0132474      | acta1     | ENSG000000000001 |
| ENSG000000000009     | -1.5900295     | 3.92E-11  | acta1              | ENSG000000000009 | 2.0192201      | acta1     | ENSG000000000001 |
| ENSG000000000010     | -1.5928377     | 1.01E-11  | acta1              | ENSG000000000010 | 2.0251928      | acta1     | ENSG000000000001 |
| ENSG000000000011     | -1.5956459     | 2.71E-11  | acta1              | ENSG000000000011 | 2.0311655      | acta1     | ENSG000000000001 |
| ENSG000000000012     | -1.5984541     | 7.21E-11  | acta1              | ENSG000000000012 | 2.0371382      | acta1     | ENSG000000000001 |
| ENSG000000000013     | -1.6012623     | 1.91E-11  | acta1              | ENSG000000000013 | 2.0431109      | acta1     | ENSG000000000001 |
| ENSG000000000014     | -1.6040705     | 5.21E-11  | acta1              | ENSG000000000014 | 2.0490836      | acta1     | ENSG000000000001 |
| ENSG000000000015     | -1.6068787     | 1.41E-11  | acta1              | ENSG000000000015 | 2.0550563      | acta1     | ENSG000000000001 |
| ENSG000000000016     | -1.6096869     | 3.81E-11  | acta1              | ENSG000000000016 | 2.0610290      | acta1     | ENSG000000000001 |
| ENSG000000000017     | -1.6124951     | 1.01E-11  | acta1              | ENSG000000000017 | 2.0669917      | acta1     | ENSG000000000001 |
| ENSG000000000018     | -1.6153033     | 2.71E-11  | acta1              | ENSG000000000018 | 2.0729644      | acta1     | ENSG000000000001 |
| ENSG000000000019     | -1.6181115     | 7.21E-11  | acta1              | ENSG000000000019 | 2.0789371      | acta1     | ENSG000000000001 |
| ENSG000000000020     | -1.6209197     | 1.91E-11  | acta1              | ENSG000000000020 | 2.0849098      | acta1     | ENSG000000000001 |
| ENSG000000000021     | -1.6237279     | 5.21E-11  | acta1              | ENSG000000000021 | 2.0908825      | acta1     | ENSG000000000001 |
| ENSG000000000022     | -1.6265361     | 1.41E-11  | acta1              | ENSG000000000022 | 2.0968552      | acta1     | ENSG000000000001 |
| ENSG000000000023     | -1.6293443     | 3.81E-11  | acta1              | ENSG000000000023 | 2.1028279      | acta1     | ENSG000000000001 |
| ENSG000000000024     | -1.6321525     | 1.01E-11  | acta1              | ENSG000000000024 | 2.1088006      | acta1     | ENSG000000000001 |
| ENSG000000000025     | -1.6349607     | 2.71E-11  | acta1              | ENSG000000000025 | 2.1147733      | acta1     | ENSG000000000001 |
| ENSG000000000026     | -1.6377689     | 7.21E-11  | acta1              | ENSG000000000026 | 2.1207460      | acta1     | ENSG000000000001 |
| ENSG000000000027     | -1.6405771     | 1.91E-11  | acta1              | ENSG000000000027 | 2.1267187      | acta1     | ENSG000000000001 |
| ENSG000000000028     | -1.6433853     | 5.21E-11  | acta1              | ENSG000000000028 | 2.1326914      | acta1     | ENSG000000000001 |
| ENSG000000000029     | -1.6461935     | 1.41E-11  | acta1              | ENSG000000000029 | 2.1386641      | acta1     | ENSG000000000001 |
| ENSG000000000030     | -1.6489917     | 3.81E-11  | acta1              | ENSG000000000030 | 2.1446368      | acta1     | ENSG000000000001 |
| ENSG000000000031     | -1.6517999     | 1.01E-11  | acta1              | ENSG000000000031 | 2.1506095      | acta1     | ENSG000000000001 |
| ENSG000000000032     | -1.6546081     | 2.71E-11  | acta1              | ENSG000000000032 | 2.1565822      | acta1     | ENSG000000000001 |
| ENSG000000000033     | -1.6574163     | 7.21E-11  | acta1              | ENSG000000000033 | 2.1625549      | acta1     | ENSG000000000001 |
| ENSG000000000034     | -1.6602245     | 1.91E-11  | acta1              | ENSG000000000034 | 2.1685276      | acta1     | ENSG000000000001 |
| ENSG000000000035     | -1.6630327     | 5.21E-11  | acta1              | ENSG000000000035 | 2.1745003      | acta1     | ENSG000000000001 |
| ENSG000000000036     | -1.6658409     | 1.41E-11  | acta1              | ENSG000000000036 | 2.1804730      | acta1     | ENSG000000000001 |
| ENSG000000000037     | -1.6686491     | 3.81E-11  | acta1              | ENSG000000000037 | 2.1864457      | acta1     | ENSG000000000001 |
| ENSG000000000038     | -1.6714573     | 1.01E-11  | acta1              | ENSG000000000038 | 2.1924184      | acta1     | ENSG000000000001 |
| ENSG000000000039     | -1.6742655     | 2.71E-11  | acta1              | ENSG000000000039 | 2.1983911      | acta1     | ENSG000000000001 |
| ENSG000000000040     | -1.6770737     | 7.21E-11  | acta1              | ENSG000000000040 | 2.2043638      | acta1     | ENSG000000000001 |
| ENSG000000000041     | -1.6798819     | 1.91E-11  | acta1              | ENSG000000000041 | 2.2103365      | acta1     | ENSG000000000001 |
| ENSG000000000042     | -1.6826901     | 5.21E-11  | acta1              | ENSG000000000042 | 2.2163092      | acta1     | ENSG000000000001 |
| ENSG000000000043     | -1.6854983     | 1.41E-11  | acta1              | ENSG000000000043 | 2.2222819      | acta1     | ENSG000000000001 |
| ENSG000000000044     | -1.6883065     | 3.81E-11  | acta1              | ENSG000000000044 | 2.2282546      | acta1     | ENSG000000000001 |
| ENSG000000000045     | -1.6911147     | 1.01E-11  | acta1              | ENSG000000000045 | 2.2342273      | acta1     | ENSG000000000001 |
| ENSG000000000046     | -1.6939229     | 2.71E-11  | acta1              | ENSG000000000046 | 2.2402000      | acta1     | ENSG000000000001 |
| ENSG000000000047     | -1.6967311     | 7.21E-11  | acta1              | ENSG000000000047 | 2.2461727      | acta1     | ENSG000000000001 |
| ENSG000000000048     | -1.6995393     | 1.91E-11  | acta1              | ENSG000000000048 | 2.2521454      | acta1     | ENSG000000000001 |
| ENSG000000000049     | -1.7023475     | 5.21E-11  | acta1              | ENSG000000000049 | 2.2581181      | acta1     | ENSG000000000001 |
| ENSG000000000050     | -1.7051557     | 1.41E-11  | acta1              | ENSG000000000050 | 2.2640908      | acta1     | ENSG000000000001 |
| ENSG000000000051     | -1.7079639     | 3.81E-11  | acta1              | ENSG000000000051 | 2.2700635      | acta1     | ENSG000000000001 |
| ENSG000000000052     | -1.7107721     | 1.01E-11  | acta1              | ENSG000000000052 | 2.2760362      | acta1     | ENSG000000000001 |
| ENSG000000000053     | -1.7135803     | 2.71E-11  | acta1              | ENSG000000000053 | 2.2820089      | acta1     | ENSG000000000001 |
| ENSG000000000054     | -1.7163885     | 7.21E-11  | acta1              | ENSG000000000054 | 2.2879816      | acta1     | ENSG000000000001 |
| ENSG000000000055     | -1.7191967     | 1.91E-11  | acta1              | ENSG000000000055 | 2.2939543      | acta1     | ENSG000000000001 |
| ENSG000000000056     | -1.7219949     | 5.21E-11  | acta1              | ENSG000000000056 | 2.2999270      | acta1     | ENSG000000000001 |
| ENSG000000000057     | -1.7248031     | 1.41E-11  | acta1              | ENSG000000000057 | 2.3059000      | acta1     | ENSG000000000001 |
| ENSG000000000058     | -1.7276113     | 3.81E-11  | acta1              | ENSG000000000058 | 2.3118727      | acta1     | ENSG000000000001 |
| ENSG000000000059     | -1.7304195     | 1.01E-11  | acta1              | ENSG000000000059 | 2.3178454      | acta1     | ENSG000000000001 |
| ENSG000000000060     | -1.7332277     | 2.71E-11  | acta1              | ENSG000000000060 | 2.3238181      | acta1     | ENSG000000000001 |
| ENSG000000000061     | -1.7360359     | 7.21E-11  | acta1              | ENSG000000000061 | 2.3297908      | acta1     | ENSG000000000001 |
| ENSG000000000062     | -1.7388441     | 1.91E-11  | acta1              | ENSG000000000062 | 2.3357635      | acta1     | ENSG000000000001 |
| ENSG000000000063     | -1.7416523     | 5.21E-11  | acta1              | ENSG000000000063 | 2.3417362      | acta1     | ENSG000000000001 |
| ENSG000000000064     | -1.7444605     | 1.41E-11  | acta1              | ENSG000000000064 | 2.3477089      | acta1     | ENSG000000000001 |
| ENSG000000000065     | -1.7472687     | 3.81E-11  | acta1              | ENSG000000000065 | 2.3536816      | acta1     | ENSG000000000001 |
| ENSG000000000066     | -1.7500769     | 1.01E-11  | acta1              | ENSG000000000066 | 2.3596543      | acta1     | ENSG000000000001 |
| ENSG000000000067     | -1.7528851     | 2.71E-11  | acta1              | ENSG000000000067 | 2.3656270      | acta1     | ENSG000000000001 |
| ENSG000000000068     | -1.7556933     | 7.21E-11  | acta1              | ENSG000000000068 | 2.3716000      | acta1     | ENSG000000000001 |
| ENSG000000000069     | -1.7585015     | 1.91E-11  | acta1              | ENSG000000000069 | 2.3775727      | acta1     | ENSG000000000001 |
| ENSG000000000070     | -1.7613097     | 5.21E-11  | acta1              | ENSG000000000070 | 2.3835454      | acta1     | ENSG000000000001 |
| ENSG000000000071     | -1.7641179     | 1.41E-11  | acta1              | ENSG000000000071 | 2.3895181      | acta1     | ENSG000000000001 |
| ENSG000000000072     | -1.7669261     | 3.81E-11  | acta1              | ENSG000000000072 | 2.3954908      | acta1     | ENSG000000000001 |
| ENSG000000000073     | -1.7697343     | 1.01E-11  | acta1              | ENSG000000000073 | 2.4014635      | acta1     | ENSG000000000001 |
| ENSG000000000074     | -1.7725425     | 2.71E-11  | acta1              | ENSG000000000074 | 2.4074362      | acta1     | ENSG000000000001 |
| ENSG000000000075     | -1.7753507     | 7.21E-11  | acta1              | ENSG000000000075 | 2.4134089      | acta1     | ENSG000000000001 |
| ENSG000000000076     | -1.7781589     | 1.91E-11  | acta1              | ENSG000000000076 | 2.4193816      | acta1     | ENSG000000000001 |
| ENSG000000000077     | -1.7809671     | 5.21E-11  | acta1              | ENSG000000000077 | 2.4253543      | acta1     | ENSG000000000001 |
| ENSG000000000078     | -1.7837753     | 1.41E-11  | acta1              | ENSG000000000078 | 2.4313270      | acta1     | ENSG000000000001 |
| ENSG000000000079     | -1.7865835     | 3.81E-11  | acta1              | ENSG000000000079 | 2.4373000      | acta1     | ENSG000000000001 |
| ENSG000000000080     | -1.7893917     | 1.01E-11  | acta1              | ENSG000000000080 | 2.4432727      | acta1     | ENSG000000000001 |
| ENSG000000000081     | -1.7921999     | 2.71E-11  | acta1              | ENSG000000000081 | 2.4492454      | acta1     | ENSG000000000001 |
| ENSG000000000082     | -1.7950081     | 7.21E-11  | acta1              | ENSG000000000082 | 2.4552181      | acta1     | ENSG000000000001 |
| ENSG000000000083     | -1.7978163     | 1.91E-11  | acta1              | ENSG000000000083 | 2.4611908      | acta1     | ENSG000000000001 |
| ENSG000000000084     | -1.8006245     | 5.21E-11  | acta1              | ENSG000000000084 | 2.4671635      | acta1     | ENSG000000000001 |
| ENSG000000000085     | -1.8034327     | 1.41E-11  | acta1              | ENSG000000000085 | 2.4731362      | acta1     | ENSG000000000001 |
| ENSG000000000086     | -1.8062409     | 3.81E-11  | acta1              | ENSG000000000086 | 2.4791089      | acta1     | ENSG000000000001 |
| ENSG000000000087     | -1.8090491     | 1.01E-11  | acta1              | ENSG000000000087 | 2.4850816      | acta1     | ENSG000000000001 |
| ENSG000000000088     | -1.8118573     | 2.71E-11  | acta1              | ENSG000000000088 | 2.4910543      | acta1     | ENSG000000000001 |
| ENSG000000000089     | -1.8146655     | 7.21E-11  | acta1              | ENSG000000000089 | 2.4970270      | acta1     | ENSG000000000001 |
| ENSG000000000090     | -1.8174737     | 1.91E-11  | acta1              | ENSG000000000090 | 2.5029997      | acta1     | ENSG000000000001 |
| ENSG000000000091     | -1.8202819     | 5.21E-11  | acta1              | ENSG000000000091 | 2.5089724      | acta1     | ENSG000000000001 |
| ENSG000000000092     | -1.8230901     | 1.41E-11  | acta1              | ENSG000000000092 | 2.5149451      | acta1     | ENSG000000000001 |
| ENSG000000000093     | -1.8258983     | 3.81E-11  | acta1              | ENSG000000000093 | 2.5209178      | acta1     | ENSG000000000001 |
| ENSG000000000094     | -1.8287065     | 1.01E-11  | acta1              | ENSG000000000094 | 2.5268905      | acta1     | ENSG000000000001 |
| ENSG000000000095     | -1.83          |           |                    |                  |                |           |                  |
