# Supplementary material
Source: PubMed Central journal article supplement (PMC7840310)
Supplement: Supp_Table3.pdf [file Supp_Table3.pdf]

Supplemental Table 3. Genes regulated by TRs

| Gene ID    | Ensembl Gene | Ensembl Trans      | Gene Symbol           | Gene Name | Ensemble_Human ID                                               |
|------------|--------------|--------------------|-----------------------|-----------|-----------------------------------------------------------------|
| ENSTSETG00 | 6.99688424   | 6                  | unc51                 | unc51     | ENSG00000169344,ENSG00000169347                                 |
| ENSTSETG00 | 6.88048893   | 1.98_120           | ctnna2                | ctnna2    | ENSG00000157904,ENSG00000157905                                 |
| ENSTSETG00 | 6.89594847   | 2.618_81           | ENSTSETG0000015656    |           | ENSG00000194988,ENSG00000194984                                 |
| ENSTSETG00 | 6.869385804  | 7.851_774          | capn1                 | capn1     | ENSG00000100970                                                 |
| ENSTSETG00 | 6.17900211   | 2.647_27           | ENSTSETG0000015155    |           | ENSG00000104338                                                 |
| ENSTSETG00 | 6.65668639   | 2.461_61           | prn12                 | prn12     | ENSG00000204983,ENSG00000104338                                 |
| ENSTSETG00 | 6.44970226   | 2.751_34           | ENSTSETG0000015914    |           | ENSG00000189430                                                 |
| ENSTSETG00 | 6.11145004   | 2.731_61           | ENSTSETG0000015190    |           | ENSG00000199494,ENSG00000199497                                 |
| ENSTSETG00 | 6.10671602   | 1.181_171          | neoh1.1               | neoh1.1   | ENSG00000194408                                                 |
| ENSTSETG00 | 6.20317417   | 2.731_61           | ENSTSETG0000015192    |           | ENSG00000199494,ENSG00000199497                                 |
| ENSTSETG00 | 4.901304188  | 5.191_200          | rip3                  | rip3      | ENSG00000168125,ENSG00000170077,ENSG00000136154,ENSG00000188471 |
| ENSTSETG00 | 4.608109181  |                    | ctsm1                 | ctsm1     | ENSG00000139396                                                 |
| ENSTSETG00 | 4.60811532   | 6.271_34           | rip1                  | rip1      | ENSG00000139396                                                 |
| ENSTSETG00 | 4.371178648  | 1.801_52           | rip2                  | rip2      | ENSG00000139396                                                 |
| ENSTSETG00 | 4.393145113  | 1.791_48           | rip3                  | rip3      | ENSG00000139396                                                 |
| ENSTSETG00 | 4.34062514   | 4.821_51           | unc45b                | unc45b    | ENSG00000141161                                                 |
| ENSTSETG00 | 4.30281360   | 1.751_34           | rip4                  | rip4      | ENSG00000139396                                                 |
| ENSTSETG00 | 4.29149929   | 1.931_17           | rip5                  | rip5      | ENSG00000139396                                                 |
| ENSTSETG00 | 4.179811078  | 3.531_28           | ENSTSETG0000014195    |           | ENSG00000139610                                                 |
| ENSTSETG00 | 4.15360211   | 6.231_31           | rip6.1                | rip6.1    | ENSG00000139610                                                 |
| ENSTSETG00 | 4.132217926  | 6.921_78           | col11c3               | col11c3   | ENSG00000138536                                                 |
| ENSTSETG00 | 4.11507499   | 1.481_29           | rip8.1                | rip8.1    | ENSG00000139610                                                 |
| ENSTSETG00 | 3.771344659  | 2.981_22           | rip9.1                | rip9.1    | ENSG00000139610                                                 |
| ENSTSETG00 | 3.748571189  | ENSTSETG0000015193 |                       |           | ENSG00000128111                                                 |
| ENSTSETG00 | 3.702967118  | 2.111_20           | rip10                 | rip10     | ENSG00000139610,ENSG00000144447                                 |
| ENSTSETG00 | 3.566427992  | 1.641_151          | acta3                 | acta3     | ENSG00000106620                                                 |
| ENSTSETG00 | 3.54311188   | 1.071_96           | rip11                 | rip11     | ENSG00000134461                                                 |
| ENSTSETG00 | 3.50179904   | 1.731_22           | rip12                 | rip12     | ENSG00000134461                                                 |
| ENSTSETG00 | 4.49432114   | 8.591_29           | rip13                 | rip13     | ENSG00000134461                                                 |
| ENSTSETG00 | 4.44618911   |                    | rip14                 | rip14     | ENSG00000139795                                                 |
| ENSTSETG00 | 4.14178654   | 4.241_61           | meis3                 | meis3     | ENSG00000137745                                                 |
| ENSTSETG00 | 4.02762131   | 1.421_19           | rip15                 | rip15     | ENSG00000134461,ENSG00000104055                                 |
| ENSTSETG00 | 3.771440307  | 1.441_41           | rip16                 | rip16     | ENSG00000134461                                                 |
| ENSTSETG00 | 3.76726778   | 4.991_19           | act14                 | act14     | ENSG00000115902                                                 |
| ENSTSETG00 | 3.76025148   | 3.711_11           | rip17                 | rip17     | ENSG00000139396                                                 |
| ENSTSETG00 | 3.33118807   | 1.911_17           | gls1                  | gls1      | ENSG00000166811                                                 |
| ENSTSETG00 | 3.26293526   | 7.851_31           | rip18                 | rip18     | ENSG00000136661,ENSG0000015490,ENSG00000137975                  |
| ENSTSETG00 | 3.25849111   | 2.891_63           | rip19                 | rip19     | ENSG00000136661                                                 |
| ENSTSETG00 | 3.222133707  | 8.811_23           | rip20                 | rip20     | ENSG00000136661                                                 |
| ENSTSETG00 | 3.19102911   | 1.911_17           | rip21                 | rip21     | ENSG00000136661,ENSG0000017382,ENSG00000100534                  |
| ENSTSETG00 | 3.146871304  | 3.401_13           | cp                    | cp        | ENSG00000174527                                                 |
| ENSTSETG00 | 3.1120789    | 1.091_207          | MEG107780             |           | ENSG00000161919                                                 |
| ENSTSETG00 | 3.091481823  | 1.591_14           | ENSTSETG000001007734  |           | ENSG00000194988,ENSG00000104338                                 |
| ENSTSETG00 | 3.09434813   | 2.721_151          | act17                 | act17     | ENSG00000134955                                                 |
| ENSTSETG00 | 3.071182181  | 4.711_21           | rip22                 | rip22     | ENSG00000134955                                                 |
| ENSTSETG00 | 3.06576448   | 5.261_78           | fatp6                 | fatp6     | ENSG00000170311                                                 |
| ENSTSETG00 | 3.039126717  | 3.911_36           | rip23                 | rip23     | ENSG00000134955                                                 |
| ENSTSETG00 | 3.031470301  | 4.211_11           | rip24                 | rip24     | ENSG00000134955                                                 |
| ENSTSETG00 | 3.01693171   | 1.801_41           | rip25                 | rip25     | ENSG00000134955                                                 |
| ENSTSETG00 | 3.00262421   | 3.911_19           | rip26                 | rip26     | ENSG00000134955                                                 |
| ENSTSETG00 | 3.008504359  | 5.711_161          | rip27                 | rip27     | ENSG00000149908                                                 |
| ENSTSETG00 | 2.98118189   | 1.261_13           | rip28                 | rip28     | ENSG00000134955                                                 |
| ENSTSETG00 | 2.9791991    | 4.461_107          | rip29                 | rip29     | ENSG00000134955                                                 |
| ENSTSETG00 | 2.972394489  | 1.571_13           | rip30                 | rip30     | ENSG00000137672                                                 |
| ENSTSETG00 | 2.96402428   | 1.571_13           | rip31                 | rip31     | ENSG00000137672                                                 |
| ENSTSETG00 | 2.933500761  | 7.801_14           | ENSTSETG00000100340   |           | ENSG00000104951                                                 |
| ENSTSETG00 | 2.91277907   | 4.641_24           | rip32                 | rip32     | ENSG00000134955                                                 |
| ENSTSETG00 | 2.89249426   | 4.181_66           | rip33                 | rip33     | ENSG00000134955                                                 |
| ENSTSETG00 | 2.89249426   | 7.491_32           | rip34                 | rip34     | ENSG00000137286,ENSG00000104338                                 |
| ENSTSETG00 | 2.88128611   | 6.691_48           | rip35                 | rip35     | ENSG00000134955                                                 |
| ENSTSETG00 | 2.871707549  | 1.801_66           | meis3                 | meis3     | ENSG00000136304                                                 |
| ENSTSETG00 | 2.871707549  | 5.811_24           | rip36                 | rip36     | ENSG00000134955                                                 |
| ENSTSETG00 | 2.85279318   | 2.811_28           | ENSTSETG00000101131   |           | ENSG00000176975                                                 |
| ENSTSETG00 | 2.829575671  | 7.511_48           | act18                 | act18     | ENSG00000174602                                                 |
| ENSTSETG00 | 2.820467118  | 2.241_134          | rip37                 | rip37     | ENSG00000134955                                                 |
| ENSTSETG00 | 2.792904012  | 4.031_169          | rip38                 | rip38     | ENSG00000139801                                                 |
| ENSTSETG00 | 2.78279318   | 2.891_144          | rip39                 | rip39     | ENSG00000134955                                                 |
| ENSTSETG00 | 2.775294139  | 1.711_164          | rip40                 | rip40     | ENSG00000134955                                                 |
| ENSTSETG00 | 2.77279717   | 1.241_47           | ENSTSETG000001003890  |           | ENSG00000134955                                                 |
| ENSTSETG00 | 2.77279717   | 2.291_212          | rip41                 | rip41     | ENSG00000134955                                                 |
| ENSTSETG00 | 2.753538727  | 2.671_46           | rip42                 | rip42     | ENSG00000139835                                                 |
| ENSTSETG00 | 2.74079717   | 3.691_111          | ENSTSETG000001003217  |           | ENSG00000134955                                                 |
| ENSTSETG00 | 2.74079717   | 1.041_29           | rip43                 | rip43     | ENSG00000134955                                                 |
| ENSTSETG00 | 2.741433814  | 1.291_43           | rip44                 | rip44     | ENSG00000134955                                                 |
| ENSTSETG00 | 2.74011185   | 2.961_108          | rip45                 | rip45     | ENSG00000134955                                                 |
| ENSTSETG00 | 2.74079717   | 2.841_24           | rip46                 | rip46     | ENSG00000106673                                                 |
| ENSTSETG00 | 2.70253476   | 3.291_19           | ENSTSETG00000100350   |           | ENSG00000134955                                                 |
| ENSTSETG00 | 2.70253476   | 1.731_11           | ENSTSETG000001003479  |           | ENSG00000134955                                                 |
| ENSTSETG00 | 2.683971663  | 3.781_23           | rip47                 | rip47     | ENSG00000134955                                                 |
| ENSTSETG00 | 2.671131261  | 1.111_11           | rip48                 | rip48     | ENSG00000134955                                                 |
| ENSTSETG00 | 2.66118611   | 5.211_11           | ENSTSETG000001003148  |           | ENSG00000194988,ENSG00000104338                                 |
| ENSTSETG00 | 2.63919277   | 4.03111            | rip49                 | rip49     | ENSG00000134955                                                 |
| ENSTSETG00 | 2.64416449   | 1.391_14           | rip50                 | rip50     | ENSG00000134955                                                 |
| ENSTSETG00 | 2.632471681  | 1.411_131          | rip51                 | rip51     | ENSG00000134955                                                 |
| ENSTSETG00 | 2.62119021   | 8.031_11           | rip52                 | rip52     | ENSG00000134955                                                 |
| ENSTSETG00 | 2.606574497  | 1.041_21           | rip53                 | rip53     | ENSG00000142552                                                 |
| ENSTSETG00 | 2.59579902   | 1.791_40           | rip54                 | rip54     | ENSG00000136122                                                 |
| ENSTSETG00 | 2.58124279   | 1.711_11           | ENSTSETG000001003843  |           | ENSG00000178864                                                 |
| ENSTSETG00 | 2.56513524   | 2.121_45           | rip55                 | rip55     | ENSG00000139151                                                 |
| ENSTSETG00 | 2.56657568   | 1.511_10           | ENSTSETG000001003729  |           | ENSG00000100972                                                 |
| ENSTSETG00 | 2.5733283    | 3.111_72           | rip56                 | rip56     | ENSG00000149283                                                 |
| ENSTSETG00 | 2.57329631   |                    | rip57                 | rip57     | ENSG00000149283                                                 |
| ENSTSETG00 | 2.55649707   | 6.241_43           | rip58                 | rip58     | ENSG00000134955                                                 |
| ENSTSETG00 | 2.53973582   | 3.511_10           | rip59                 | rip59     | ENSG00000194988,ENSG00000104338                                 |
| ENSTSETG00 | 2.53015482   | 6.311_55           | rip60                 | rip60     | ENSG00000134955                                                 |
| ENSTSETG00 | 2.538516618  | 1.211_111          | rip61                 | rip61     | ENSG00000139396                                                 |
| ENSTSETG00 | 2.53699763   | 1.871_111          | rip62                 | rip62     | ENSG00000136122                                                 |
| ENSTSETG00 | 2.50899413   | 1.321_104          | rip63                 | rip63     | ENSG00000136122                                                 |
| ENSTSETG00 | 2.504667249  | 7.021_61           | act19                 | act19     | ENSG00000134955                                                 |
| ENSTSETG00 | 2.49848276   | 2.791_161          | rip64                 | rip64     | ENSG00000134955                                                 |
| ENSTSETG00 | 2.49848276   | 2.231_14           | rip65                 | rip65     | ENSG00000130175                                                 |
| ENSTSETG00 | 2.49893903   | 5.911_41           | rip66                 | rip66     | ENSG00000134955                                                 |
| ENSTSETG00 | 2.493940128  | 1.971_79           | rip67                 | rip67     | ENSG00000134955                                                 |
| ENSTSETG00 | 2.476767168  | 2.841_20           | rip68                 | rip68     | ENSG00000138778                                                 |
| ENSTSETG00 | 2.47278121   | 7.911_44           | rip69                 | rip69     | ENSG00000139844                                                 |
| ENSTSETG00 | 2.472018748  | 2.731_49           | rip70                 | rip70     | ENSG00000137184                                                 |
| ENSTSETG00 | 2.469021148  | 1.071_79           | rip71                 | rip71     | ENSG00000179144                                                 |
| ENSTSETG00 | 2.45171558   | 3.021_74           | rip72                 | rip72     | ENSG00000165986                                                 |
| ENSTSETG00 | 2.451193448  | 5.061_68           | rip73                 | rip73     | ENSG00000134955                                                 |
| ENSTSETG00 | 2.446244118  | 1.511_10           | ENSTSETG000001003818  |           | ENSG00000154118,ENSG00000111124,ENSG00000113983                 |
| ENSTSETG00 | 2.44628758   | 2.621_18           | rip74                 | rip74     | ENSG00000140149                                                 |
| ENSTSETG00 | 2.41849962   | 1.171_131          | rip75                 | rip75     | ENSG00000134955                                                 |
| ENSTSETG00 | 2.41838904   | 4.691_129          | rip76                 | rip76     | ENSG00000134955                                                 |
| ENSTSETG00 | 2.41477607   | 2.861_28           | rip77                 | rip77     | ENSG00000134955                                                 |
| ENSTSETG00 | 2.414343308  | 7.711_52           | rip78                 | rip78     | ENSG00000134955                                                 |
| ENSTSETG00 | 2.4064358    | 1.211_11           | rip79                 | rip79     | ENSG00000136480                                                 |
| ENSTSETG00 | 2.40312717   | 2.711_11           | ENSTSETG000001003964  |           | ENSG00000175679                                                 |
| ENSTSETG00 | 2.40478162   | 7.941_91           | rip80                 | rip80     | ENSG00000134955                                                 |
| ENSTSETG00 | 2.401337778  | 1.811_91           | rip81                 | rip81     | ENSG000001003964                                                |
| ENSTSETG00 | 2.394848429  | 1.111_91           | rip82                 | rip82     | ENSG00000134955                                                 |
| ENSTSETG00 | 2.3904358    | 2.611_09           | rip83                 | rip83     | ENSG00000172548                                                 |
| ENSTSETG00 | 2.38447138   | 1.961_09           | ENSTSETG000001003143  |           | ENSG00000137614,ENSG000001003964                                |
| ENSTSETG00 | 2.374491127  | 2.021_18           | rip84                 | rip84     | ENSG00000134955                                                 |
| ENSTSETG00 | 2.363946056  | 1.891_48           | rip85                 | rip85     | ENSG00000134955                                                 |
| ENSTSETG00 | 2.360217814  | 1.131_23           | rip86                 | rip86     | ENSG00000134955                                                 |
| ENSTSETG00 | 2.357081436  | 1.231_55           | rip87                 | rip87     | ENSG00000145426                                                 |
| ENSTSETG00 | 2.349490267  | 1.711_46           | rip88                 | rip88     | ENSG00000134955                                                 |
| ENSTSETG00 | 2.346196229  | 1.521_10           | rip89                 | rip89     | ENSG00000134955                                                 |
| ENSTSETG00 | 2.343883113  | 1.151_10           | rip90                 | rip90     | ENSG00000134955                                                 |
| ENSTSETG00 | 2.34339314   | 4.161_11           | rip91                 | rip91     | ENSG00000134955                                                 |
| ENSTSETG00 | 2.34142564   | 4.611_90           | rip92                 | rip92     | ENSG00000136180                                                 |
| ENSTSETG00 | 2.33989996   | 6.291_100          | rip93                 | rip93     | ENSG00000134955                                                 |
| ENSTSETG00 | 2.339796077  | 4.861_281          | rip94                 | rip94     | ENSG00000176975                                                 |
| ENSTSETG00 | 2.32946462   | 1.991_12           | ENSTSETG0000010030197 |           | ENSG00000176575                                                 |
| ENSTSETG00 | 2.329252138  | 8.791_26           | rip95                 | rip95     | ENSG00000134955                                                 |
| ENSTSETG00 | 2.318242126  | 1.521_264          | rip96                 | rip96     | ENSG00000132643                                                 |
| ENSTSETG00 | 2.30941384   | 1.011_08           | rip97                 | rip97     | ENSG00000134955                                                 |
| ENSTSETG00 | 2.298197701  | 1.211_18           | rip98                 | rip98     | ENSG00000134955                                                 |
| ENSTSETG00 | 2.29211096   | 7.081_18           | rip99                 | rip99     | ENSG00000134955                                                 |
| ENSTSETG00 | 2.291132301  | 1.111_09           | rip100                | rip100    | ENSG00000134955                                                 |
| ENSTSETG00 | 2.29089111   | 1.731_17           | rip101                | rip101    | ENSG00000142945                                                 |
| ENSTSETG00 | 2.282102248  | 1.961_84           | rip102                | rip102    | ENSG00000134955                                                 |
| ENSTSETG00 | 2.27761717   | 3.611_13           | rip103                | rip103    | ENSG00000146900                                                 |
| ENSTSETG00 | 2.272814529  | 1.891_13           | rip104                | rip104    | ENSG00000134955                                                 |
| ENSTSETG00 | 2.27092562   | 4.611_26           | rip105                | rip105    | ENSG00000134955                                                 |
| ENSTSETG00 | 2.268773577  | 1.161_121          | rip106                | rip106    | ENSG00000138366                                                 |
| ENSTSETG00 | 2.26243976   | 1.241_29           | rip107                | rip107    | ENSG00000134955                                                 |
| ENSTSETG00 | 2.241497129  | 1.581_34           | rip108                | rip108    | ENSG00000194988,ENSG00000172512                                 |
| ENSTSETG00 | 2.240828101  | 1.521_108          | rip109                | rip109    | ENSG00000138140                                                 |
| ENSTSETG00 | 2.24054245   | 1.091_21           | rip110                |           |                                                                 |

|     |           |            |            |                    |                  |                 |                    |
|-----|-----------|------------|------------|--------------------|------------------|-----------------|--------------------|
| 188 | ENRSETG00 | 2.13664857 | 1.481.33   | ENRSETG00000003928 | ENSG00000204361  | ENSG00000017634 | ENSG00000000000110 |
| 189 | ENRSETG00 | 1.12701521 | 1.12701521 | rs6541             | rs6541           | rs6541          | ENSG00000017637    |
| 190 | ENRSETG00 | 1.11450563 | 9.18E-18   | starap             | STAR related     | ENSG00000019433 |                    |
| 191 | ENRSETG00 | 2.11707953 | 1.24E-10   | nr1a1              | NR1A protein     | ENSG00000019499 |                    |
| 192 | ENRSETG00 | 1.11842023 | 5.84E-28   | rs6542             | rs6542           | rs6542          | ENSG00000019508    |
| 193 | ENRSETG00 | 2.11087377 | 4.36E-14   | nr1a3              | nr1a3            | nr1a3           | ENSG00000017807    |
| 194 | ENRSETG00 | 3.10542517 | 1.62E-05   | rs6543             | rs6543           | rs6543          | ENSG00000017239    |
| 195 | ENRSETG00 | 2.08613881 | 1.71E-22   | cd814              | cyclin dependent | ENSG00000008091 |                    |
| 196 | ENRSETG00 | 2.08144424 | 4.71E-13   | rs6544             | rs6544           | rs6544          | ENSG00000007744    |
| 197 | ENRSETG00 | 2.07173117 | 2.83E-21   | rs6545             | rs6545           | rs6545          | ENSG00000017320    |
| 198 | ENRSETG00 | 2.06563279 | 6.53E-41   | rs6546             | rs6546           | rs6546          | ENSG00000008769    |
| 199 | ENRSETG00 | 2.06148877 | 8.61E-14   | rs6547             | rs6547           | rs6547          | ENSG00000006096    |
| 200 | ENRSETG00 | 2.04000998 | 2.2E-18    | rs6548             | rs6548           | rs6548          | ENSG00000017294    |
| 201 | ENRSETG00 | 2.04209158 | 4.31E-29   | rs6549             | rs6549           | rs6549          | ENSG00000007972    |
| 202 | ENRSETG00 | 2.04009133 | 4.06E-11   | rs6550             | rs6550           | rs6550          | ENSG00000019193    |
| 203 | ENRSETG00 | 2.03924644 | 6.2E-11    | rs6551             | rs6551           | rs6551          | ENSG00000014241    |
| 204 | ENRSETG00 | 2.03853748 | 4.00E-13   | rs6552             | rs6552           | rs6552          | ENSG00000011296    |
| 205 | ENRSETG00 | 2.03255559 | 0          | rs6553             | rs6553           | rs6553          | ENSG00000019862    |
| 206 | ENRSETG00 | 2.02939869 | 1.42E-11   | rs6554             | rs6554           | rs6554          | ENSG00000018474    |
| 207 | ENRSETG00 | 2.02934684 | 2.15E-09   | rs6555             | rs6555           | rs6555          | ENSG00000013346    |
| 208 | ENRSETG00 | 2.02913588 | 0          | rs6556             | rs6556           | rs6556          | ENSG00000013369    |
| 209 | ENRSETG00 | 2.02913588 | 0          | rs6557             | rs6557           | rs6557          | ENSG00000018092    |
| 210 | ENRSETG00 | 2.01684218 | 5.34E-11   | rs6558             | rs6558           | rs6558          | ENSG00000018476    |
| 211 | ENRSETG00 | 2.00839612 | 2.03E-01   | rs6559             | rs6559           | rs6559          | ENSG00000019196    |
| 212 | ENRSETG00 | 2.00839612 | 2.03E-01   | rs6560             | rs6560           | rs6560          | ENSG00000019196    |
| 213 | ENRSETG00 | 2.00593427 | 1.6E-23    | rs6561             | rs6561           | rs6561          | ENSG00000011242    |
| 214 | ENRSETG00 | 2.00293013 | 3.05E-23   | rs6562             | rs6562           | rs6562          | ENSG00000019276    |
| 215 | ENRSETG00 | 2.00129681 | 7.93E-09   | rs6563             | rs6563           | rs6563          | ENSG00000010829    |
| 216 | ENRSETG00 | 2.00079703 | 4.94E-20   | rs6564             | rs6564           | rs6564          | ENSG00000019796    |
| 217 | ENRSETG00 | 1.99848914 | 1.02E-19   | rs6565             | rs6565           | rs6565          | ENSG00000019186    |
| 218 | ENRSETG00 | 1.99619394 | 9.11E-08   | rs6566             | rs6566           | rs6566          | ENSG00000014812    |
| 219 | ENRSETG00 | 1.99509318 | 2.31E-18   | rs6567             | rs6567           | rs6567          | ENSG00000019174    |
| 220 | ENRSETG00 | 1.99310048 | 1.62E-51   | rs6568             | rs6568           | rs6568          | ENSG00000017571    |
| 221 | ENRSETG00 | 1.98911138 | 2.19E-12   | rs6569             | rs6569           | rs6569          | ENSG00000017172    |
| 222 | ENRSETG00 | 1.98639634 | 5.39E-11   | rs6570             | rs6570           | rs6570          | ENSG00000019184    |
| 223 | ENRSETG00 | 1.98505163 | 0          | rs6571             | rs6571           | rs6571          | ENSG00000015917    |
| 224 | ENRSETG00 | 1.98022701 | 2.73E-43   | rs6572             | rs6572           | rs6572          | ENSG00000019186    |
| 225 | ENRSETG00 | 1.97820712 | 1.6E-81    | rs6573             | rs6573           | rs6573          | ENSG00000008038    |
| 226 | ENRSETG00 | 1.97730407 | 6.20E-11   | rs6574             | rs6574           | rs6574          | ENSG00000019719    |
| 227 | ENRSETG00 | 1.97533402 | 3.41E-09   | rs6575             | rs6575           | rs6575          | ENSG00000018028    |
| 228 | ENRSETG00 | 1.97526213 | 2.14E-11   | rs6576             | rs6576           | rs6576          | ENSG00000019719    |
| 229 | ENRSETG00 | 1.97478408 | 1.50E-08   | rs6577             | rs6577           | rs6577          | ENSG00000019719    |
| 230 | ENRSETG00 | 1.97131241 | 9.76E-11   | rs6578             | rs6578           | rs6578          | ENSG00000008955    |
| 231 | ENRSETG00 | 1.96741947 | 1.97E-29   | rs6579             | rs6579           | rs6579          | ENSG00000017771    |
| 232 | ENRSETG00 | 1.96581023 | 4.87E-11   | rs6580             | rs6580           | rs6580          | ENSG00000019829    |
| 233 | ENRSETG00 | 1.96540918 | 5.62E-38   | rs6581             | rs6581           | rs6581          | ENSG00000018308    |
| 234 | ENRSETG00 | 1.96462044 | 0          | rs6582             | rs6582           | rs6582          | ENSG00000019402    |
| 235 | ENRSETG00 | 1.95124022 | 7.50E-09   | rs6583             | rs6583           | rs6583          | ENSG00000008193    |
| 236 | ENRSETG00 | 1.94973993 | 7.02E-19   | rs6584             | rs6584           | rs6584          | ENSG00000018971    |
| 237 | ENRSETG00 | 1.94721012 | 4.36E-09   | rs6585             | rs6585           | rs6585          | ENSG00000018701    |
| 238 | ENRSETG00 | 1.94518181 | 2.44E-07   | rs6586             | rs6586           | rs6586          | ENSG00000012082    |
| 239 | ENRSETG00 | 1.94474044 | 1.97E-12   | rs6587             | rs6587           | rs6587          | ENSG00000006098    |
| 240 | ENRSETG00 | 1.94057844 | 6.05E-98   | rs6588             | rs6588           | rs6588          | ENSG00000019058    |
| 241 | ENRSETG00 | 1.93961405 | 3.90E-54   | rs6589             | rs6589           | rs6589          | ENSG00000018684    |
| 242 | ENRSETG00 | 1.93589931 | 8.73E-21   | rs6590             | rs6590           | rs6590          | ENSG00000019566    |
| 243 | ENRSETG00 | 1.93131685 | 0          | rs6591             | rs6591           | rs6591          | ENSG00000012686    |
| 244 | ENRSETG00 | 1.92924611 | 1.0E-25    | rs6592             | rs6592           | rs6592          | ENSG00000000047    |
| 245 | ENRSETG00 | 1.92623362 | 7.80E-49   | rs6593             | rs6593           | rs6593          | ENSG00000014927    |
| 246 | ENRSETG00 | 1.92481108 | 1.40E-26   | rs6594             | rs6594           | rs6594          | ENSG00000018986    |
| 247 | ENRSETG00 | 1.92447761 | 1.80E-15   | rs6595             | rs6595           | rs6595          | ENSG00000019974    |
| 248 | ENRSETG00 | 1.91575624 | 7.17E-40   | rs6596             | rs6596           | rs6596          | ENSG00000016703    |
| 249 | ENRSETG00 | 1.91058888 | 5.11E-20   | rs6597             | rs6597           | rs6597          | ENSG00000011539    |
| 250 | ENRSETG00 | 1.90454545 | 4.77E-28   | rs6598             | rs6598           | rs6598          | ENSG00000008148    |
| 251 | ENRSETG00 | 1.90381318 | 1.96E-10   | rs6599             | rs6599           | rs6599          | ENSG00000019496    |
| 252 | ENRSETG00 | 1.90129561 | 3.41E-11   | rs6600             | rs6600           | rs6600          | ENSG00000008096    |
| 253 | ENRSETG00 | 1.89771978 | 6.69E-13   | rs6601             | rs6601           | rs6601          | ENSG00000014033    |
| 254 | ENRSETG00 | 1.89697799 | 0          | rs6602             | rs6602           | rs6602          | ENSG00000014039    |
| 255 | ENRSETG00 | 1.89648697 | 0          | rs6603             | rs6603           | rs6603          | ENSG00000016213    |
| 256 | ENRSETG00 | 1.89649788 | 2.80E-40   | rs6604             | rs6604           | rs6604          | ENSG00000018937    |
| 257 | ENRSETG00 | 1.89313174 | 4.30E-07   | rs6605             | rs6605           | rs6605          | ENSG00000019685    |
| 258 | ENRSETG00 | 1.89054858 | 1.60E-06   | rs6606             | rs6606           | rs6606          | ENSG00000018917    |
| 259 | ENRSETG00 | 1.88727277 | 8.53E-35   | rs6607             | rs6607           | rs6607          | ENSG00000018917    |
| 260 | ENRSETG00 | 1.88224041 | 4.45E-56   | rs6608             | rs6608           | rs6608          | ENSG00000010145    |
| 261 | ENRSETG00 | 1.87849587 | 1.50E-20   | rs6609             | rs6609           | rs6609          | ENSG00000017407    |
| 262 | ENRSETG00 | 1.87523467 | 7.58E-08   | rs6610             | rs6610           | rs6610          | ENSG00000018802    |
| 263 | ENRSETG00 | 1.87284445 | 2.9E-31    | rs6611             | rs6611           | rs6611          | ENSG00000018824    |
| 264 | ENRSETG00 | 1.87228215 | 0          | rs6612             | rs6612           | rs6612          | ENSG00000018929    |
| 265 | ENRSETG00 | 1.86868704 | 1.2E-21    | rs6613             | rs6613           | rs6613          | ENSG00000014805    |
| 266 | ENRSETG00 | 1.86538973 | 1.30E-08   | rs6614             | rs6614           | rs6614          | ENSG00000017891    |
| 267 | ENRSETG00 | 1.86447978 | 1.08E-08   | rs6615             | rs6615           | rs6615          | ENSG00000018181    |
| 268 | ENRSETG00 | 1.85143424 | 2.37E-27   | rs6616             | rs6616           | rs6616          | ENSG00000018182    |
| 269 | ENRSETG00 | 1.85011138 | 0          | rs6617             | rs6617           | rs6617          | ENSG00000013183    |
| 270 | ENRSETG00 | 1.84854928 | 1.14E-55   | rs6618             | rs6618           | rs6618          | ENSG00000014230    |
| 271 | ENRSETG00 | 1.84808913 | 1.60E-18   | rs6619             | rs6619           | rs6619          | ENSG00000018678    |
| 272 | ENRSETG00 | 1.84491861 | 1.50E-21   | rs6620             | rs6620           | rs6620          | ENSG00000014664    |
| 273 | ENRSETG00 | 1.84297969 | 1.17E-24   | rs6621             | rs6621           | rs6621          | ENSG00000014826    |
| 274 | ENRSETG00 | 1.83711111 | 5.03E-44   | rs6622             | rs6622           | rs6622          | ENSG00000018976    |
| 275 | ENRSETG00 | 1.83612655 | 1.01E-09   | rs6623             | rs6623           | rs6623          | ENSG00000018628    |
| 276 | ENRSETG00 | 1.83568177 | 1.00E-21   | rs6624             | rs6624           | rs6624          | ENSG00000019190    |
| 277 | ENRSETG00 | 1.83565113 | 9.19E-28   | rs6625             | rs6625           | rs6625          | ENSG00000017564    |
| 278 | ENRSETG00 | 1.82229079 | 6.09E-08   | rs6626             | rs6626           | rs6626          | ENSG00000017154    |
| 279 | ENRSETG00 | 1.82120234 | 0          | rs6627             | rs6627           | rs6627          | ENSG00000017927    |
| 280 | ENRSETG00 | 1.81917925 | 6.04E-11   | rs6628             | rs6628           | rs6628          | ENSG00000018637    |
| 281 | ENRSETG00 | 1.81893958 | 8.80E-12   | rs6629             | rs6629           | rs6629          | ENSG00000016559    |
| 282 | ENRSETG00 | 1.81879911 | 5.80E-11   | rs6630             | rs6630           | rs6630          | ENSG00000018987    |
| 283 | ENRSETG00 | 1.81127041 | 1.34E-83   | rs6631             | rs6631           | rs6631          | ENSG00000014106    |
| 284 | ENRSETG00 | 1.80479783 | 1.57E-08   | rs6632             | rs6632           | rs6632          | ENSG00000015940    |
| 285 | ENRSETG00 | 1.80386884 | 2.65E-08   | rs6633             | rs6633           | rs6633          | ENSG00000016642    |
| 286 | ENRSETG00 | 1.79826208 | 2.40E-18   | rs6634             | rs6634           | rs6634          | ENSG00000018191    |
| 287 | ENRSETG00 | 1.79248107 | 6.36E-15   | rs6635             | rs6635           | rs6635          | ENSG00000018919    |
| 288 | ENRSETG00 | 1.78618713 | 1.97E-23   | rs6636             | rs6636           | rs6636          | ENSG00000018093    |
| 289 | ENRSETG00 | 1.78290611 | 7.13E-13   | rs6637             | rs6637           | rs6637          | ENSG00000018034    |
| 290 | ENRSETG00 | 1.78220447 | 1.46E-11   | rs6638             | rs6638           | rs6638          | ENSG00000014681    |
| 291 | ENRSETG00 | 1.77912102 | 1.71E-01   | rs6639             | rs6639           | rs6639          | ENSG00000017426    |
| 292 | ENRSETG00 | 1.77816409 | 8.21E-15   | rs6640             | rs6640           | rs6640          | ENSG00000019412    |
| 293 | ENRSETG00 | 1.77640511 | 2.71E-06   | rs6641             | rs6641           | rs6641          | ENSG00000018808    |
| 294 | ENRSETG00 | 1.77619538 | 1.39E-11   | rs6642             | rs6642           | rs6642          | ENSG00000012466    |
| 295 | ENRSETG00 | 1.74997585 | 3.43E-13   | rs6643             | rs6643           | rs6643          | ENSG00000018036    |
| 296 | ENRSETG00 | 1.74947204 | 1.37E-13   | rs6644             | rs6644           | rs6644          | ENSG00000018182    |
| 297 | ENRSETG00 | 1.74691974 | 8.83E-09   | rs6645             | rs6645           | rs6645          | ENSG00000018290    |
| 298 | ENRSETG00 | 1.74361743 | 0          | rs6646             | rs6646           | rs6646          | ENSG00000013695    |
| 299 | ENRSETG00 | 1.74274203 | 6.13E-13   | rs6647             | rs6647           | rs6647          | ENSG00000014611    |
| 300 | ENRSETG00 | 1.74079961 | 2.27E-64   | rs6648             | rs6648           | rs6648          | ENSG00000016138    |
| 301 | ENRSETG00 | 1.73797953 | 0          | rs6649             | rs6649           | rs6649          | ENSG00000018086    |
| 302 | ENRSETG00 | 1.73597963 | 1.09E-09   | rs6650             | rs6650           | rs6650          | ENSG00000013866    |
| 303 | ENRSETG00 | 1.73248289 | 5.0E-07    | rs6651             | rs6651           | rs6651          | ENSG00000019139    |
| 304 | ENRSETG00 | 1.73248289 | 5.0E-07    | rs6652             | rs6652           | rs6652          | ENSG00000019139    |
| 305 | ENRSETG00 | 1.73055561 | 9.28E-07   | rs6653             | rs6653           | rs6653          | ENSG00000019689    |
| 306 | ENRSETG00 | 1.74777982 | 1.63E-01   | rs6654             | rs6654           | rs6654          | ENSG00000016689    |
| 307 | ENRSETG00 | 1.73996623 | 1.87E-05   | rs6655             | rs6655           | rs6655          | ENSG00000018191    |
| 308 | ENRSETG00 | 1.73960777 | 8.10E-39   | rs6656             | rs6656           | rs6656          | ENSG00000018497    |
| 309 | ENRSETG00 | 1.73745683 | 1.01E-12   | rs6657             | rs6657           | rs6657          | ENSG00000018498    |
| 310 | ENRSETG00 | 1.73656265 | 7.87E-11   | rs6658             | rs6658           | rs6658          | ENSG00000017411    |
| 311 | ENRSETG00 | 1.73594702 | 1.47E-28   | rs6659             | rs6659           | rs6659          | ENSG00000018676    |
| 312 | ENRSETG00 | 1.73111904 | 7.07E-01</ |                    |                  |                 |                    |



|     |            |             |            |                    |                 |                                                 |
|-----|------------|-------------|------------|--------------------|-----------------|-------------------------------------------------|
| 566 | ENSLTFTG00 | 1.34723691  | 0.00161324 | ENSLTFTG0000021786 | ENSG0000018764  | ENSG00000179914                                 |
| 567 | ENSLTFTG00 | 1.34870258  | 1.518113   | polycomb           |                 |                                                 |
| 568 | ENSLTFTG00 | 1.34843280  | 1.271295   | fam36b             | cc MIMD1        | ENSG0000018823                                  |
| 569 | ENSLTFTG00 | 1.34836972  | 1.34836972 | ENSLTFTG0000021787 | ENSG0000018876  | ENSG0000018876                                  |
| 570 | ENSLTFTG00 | 1.34879764  | 4.09808    | Pro1               | ca1 homolog     | ENSG0000011461,ENSG0000010565,ENSG00000116088   |
| 571 | ENSLTFTG00 | 1.34204638  | 5.97120    | ncadh              | non-SMC         | ENSG00000121152                                 |
| 572 | ENSLTFTG00 | 1.34488601  | 0.00017258 | ENSLTFTG0000021788 | ENSG00000147466 |                                                 |
| 573 | ENSLTFTG00 | 1.34418861  | 0.00113738 | ctcf1              | cachymin        | ENSG00000106128                                 |
| 574 | ENSLTFTG00 | 1.34110981  | 1.391127   | prnp1g             | prionogen       | ENSG0000018194                                  |
| 575 | ENSLTFTG00 | 1.33947843  | 1.441105   | pc1a3              | colutea carr    | ENSG0000018096                                  |
| 576 | ENSLTFTG00 | 1.3373098   | 1.211051   | brv12.1            | swainson acid   | ENSG00000137607                                 |
| 577 | ENSLTFTG00 | 1.33710809  | 2.168113   | ck44a4             | colutea carr    | ENSG00000104486                                 |
| 578 | ENSLTFTG00 | 1.335401404 | 2.114130   | app13c.1           | protein phosph  | ENSG00000119938                                 |
| 579 | ENSLTFTG00 | 1.33480471  | 0.00013164 | enm1               | serpin3 throm   | ENSG00000141494                                 |
| 580 | ENSLTFTG00 | 1.33218321  | 3.301118   | apd1               | genetic app     | ENSG00000104975                                 |
| 581 | ENSLTFTG00 | 1.33229519  | 2.51424    | fw                 | FG8 proteo-     | ENSG00000100988                                 |
| 582 | ENSLTFTG00 | 1.33041102  | 1.025103   | hsp27              | heat shock      | ENSG00000101922                                 |
| 583 | ENSLTFTG00 | 1.330023681 | 0.00167949 | ctbn7c             | ctnne finger    | ENSG00000184828                                 |
| 584 | ENSLTFTG00 | 1.32980512  | 1.390135   | l3                 | complement      | ENSG00000157749                                 |
| 585 | ENSLTFTG00 | 1.32819563  | 3.781059   | emn3               | matern3         | ENSG00000181907                                 |
| 586 | ENSLTFTG00 | 1.32709924  | 0.871231   | man1               | microtubul      | ENSG00000120539                                 |
| 587 | ENSLTFTG00 | 1.32682466  | 2.81120    | act1               | actin           | ENSG00000100066                                 |
| 588 | ENSLTFTG00 | 1.32603596  | 3.641081   | act                | tubulin tyros   | ENSG00000114999                                 |
| 589 | ENSLTFTG00 | 1.3255352   | 1.290260   | actp               | tubulin prot    | ENSG00000141494                                 |
| 590 | ENSLTFTG00 | 1.32411297  | 3.071059   | ENSLTFTG0000021789 | ENSG00000196698 |                                                 |
| 591 | ENSLTFTG00 | 1.3210017   | 4.871048   | nest1              | NIMA-relate     | ENSG00000140602                                 |
| 592 | ENSLTFTG00 | 1.32078188  | 2.81120    | actm               | MAP and act     | ENSG00000100066                                 |
| 593 | ENSLTFTG00 | 1.319192974 | 0          | ert19              | keratin 19      | ENSG00000171345                                 |
| 594 | ENSLTFTG00 | 1.31848943  | 0.00108061 | prot               | protein C       | ENSG00000119738                                 |
| 595 | ENSLTFTG00 | 1.31525211  | 5.518107   | pp4a               | type I          | ENSG00000184666                                 |
| 596 | ENSLTFTG00 | 1.31512418  | 1.581206   | act2a              | colutea carr    | ENSG00000174640                                 |
| 597 | ENSLTFTG00 | 1.31518124  | 0.00010111 | act103             | colutea carr    | ENSG0000017131,ENSG00000214447                  |
| 598 | ENSLTFTG00 | 1.31261781  | 4.181481   | ctdn4a             | tubulin alphas  | ENSG00000121416                                 |
| 599 | ENSLTFTG00 | 1.31122171  | 0.00011981 | ctdn2              | protein 2       | ENSG0000014498                                  |
| 600 | ENSLTFTG00 | 1.31110037  | 8.212124   | apm2               | z protein       | ENSG00000131957                                 |
| 601 | ENSLTFTG00 | 1.309824817 | 1.518113   | act1               | actin           | ENSG00000131759                                 |
| 602 | ENSLTFTG00 | 1.30968661  | 4.461103   | act1               | actin           | ENSG00000114544                                 |
| 603 | ENSLTFTG00 | 1.30825654  | 0.00122984 | apgnm3             | PITRM fam       | ENSG00000106122                                 |
| 604 | ENSLTFTG00 | 1.30702277  | 0.00014796 | ctd1b              | D. mepoicore    | ENSG00000180981                                 |
| 605 | ENSLTFTG00 | 1.30679924  | 2.178108   | act2               | actin           | ENSG00000130966                                 |
| 606 | ENSLTFTG00 | 1.30429489  | 2.541113   | acta3              | protein tyros   | ENSG00000184989                                 |
| 607 | ENSLTFTG00 | 1.30217511  | 0.00010591 | actm               | tubulin 1       | ENSG00000100066                                 |
| 608 | ENSLTFTG00 | 1.30208898  | 2.114214   | act7               |                 | ENSG00000100380                                 |
| 609 | ENSLTFTG00 | 1.30057413  | 0.00011341 | actg1              | suppressor      | ENSG00000140989                                 |
| 610 | ENSLTFTG00 | 1.29918661  | 0.00010301 | actm3              | potassium       | ENSG00000171211                                 |
| 611 | ENSLTFTG00 | 1.29893174  | 0.0148131  | ENSLTFTG0000021790 | ENSG00000126321 |                                                 |
| 612 | ENSLTFTG00 | 1.29827447  | 2.81120    | act1               | actin           | ENSG00000100066                                 |
| 613 | ENSLTFTG00 | 1.296364904 | 5.941081   | act2a              | ATPase, Ca      | ENSG00000151087                                 |
| 614 | ENSLTFTG00 | 1.295776709 | 0.00061431 | enr1c4             |                 | ENSG00000121491                                 |
| 615 | ENSLTFTG00 | 1.29540192  | 0.00011901 | act2               | matrix meta     | ENSG00000120466                                 |
| 616 | ENSLTFTG00 | 1.295183187 | 0.00079658 | act1               | four outsid     | ENSG00000179431                                 |
| 617 | ENSLTFTG00 | 1.295109921 | 0.00012918 | enr1b2             | collyrin        | ENSG00000104989                                 |
| 618 | ENSLTFTG00 | 1.295267656 | 1.041071   | act1               | ADP ribosyl     | ENSG00000134827,ENSG00000178282                 |
| 619 | ENSLTFTG00 | 1.29476788  | 1.721134   | enr1a2             | gen Wilms       | ENSG00000110900                                 |
| 620 | ENSLTFTG00 | 1.29174967  | 1.301301   | act12              | collyrin        | ENSG00000138270                                 |
| 621 | ENSLTFTG00 | 1.289529194 | 0.00261741 | ctd1c1             | actin depol     | ENSG00000176749                                 |
| 622 | ENSLTFTG00 | 1.287242501 | 2.401081   | actm               | family meta     | ENSG00000171942                                 |
| 623 | ENSLTFTG00 | 1.287175828 | 0.00161729 | enr1a1             | CHPM1 beta      | ENSG00000187416                                 |
| 624 | ENSLTFTG00 | 1.286206109 | 2.401134   | acta2              | cytochrome      | ENSG00000186906                                 |
| 625 | ENSLTFTG00 | 1.28503129  | 0.00018811 | actb34             | gene finger     | ENSG00000177196                                 |
| 626 | ENSLTFTG00 | 1.283993473 | 2.051048   | actd5              | protein trans   | ENSG00000178886                                 |
| 627 | ENSLTFTG00 | 1.28319348  | 0.00014414 | act1               | beta-1          | ENSG00000180963                                 |
| 628 | ENSLTFTG00 | 1.282799921 | 0          | ctdn1              | fatty acid      | ENSG00000163886                                 |
| 629 | ENSLTFTG00 | 1.28214483  | 4.811184   | ctdn10             | PK50B beta      | ENSG00000147196                                 |
| 630 | ENSLTFTG00 | 1.28203187  | 1.171513   | actm3              | actin 3         | ENSG00000174848                                 |
| 631 | ENSLTFTG00 | 1.28063019  | 0.00209541 | hap2               | walrus coat     | ENSG00000170961                                 |
| 632 | ENSLTFTG00 | 1.28043711  | 0.00013991 | ENSLTFTG0000021791 | ENSG00000184666 |                                                 |
| 633 | ENSLTFTG00 | 1.280356612 | 0.00024491 | ctdn7.2            | retinol dehyd   | ENSG00000170426,ENSG00000119947,ENSG00000213413 |
| 634 | ENSLTFTG00 | 1.27942401  | 0.00017719 | enr1c2             | regucorin       | ENSG00000189274                                 |
| 635 | ENSLTFTG00 | 1.27844184  | 0.00011419 | actm5              | beta domain     | ENSG00000174874                                 |
| 636 | ENSLTFTG00 | 1.277505173 | 1.991115   | actm8              | beta related    | ENSG00000174448                                 |
| 637 | ENSLTFTG00 | 1.27476766  | 1.571048   | actm2c             | beta            | ENSG00000180795                                 |
| 638 | ENSLTFTG00 | 1.271005791 | 2.221281   | act1bap            | BR3 binding     | ENSG00000184992                                 |
| 639 | ENSLTFTG00 | 1.269418289 | 4.661081   | actp15             | z protein       | ENSG00000151999                                 |
| 640 | ENSLTFTG00 | 1.26911445  | 2.681081   | act1               | matrix meta     | ENSG00000189181                                 |
| 641 | ENSLTFTG00 | 1.267028872 | 1.121113   | act1               | myofibrillar    | ENSG00000130592                                 |
| 642 | ENSLTFTG00 | 1.26611119  | 0.00010771 | act1               | myofibrillar    | ENSG00000180963                                 |
| 643 | ENSLTFTG00 | 1.26656688  | 1.341114   | actp1              | myofibril bet   | ENSG00000190520                                 |
| 644 | ENSLTFTG00 | 1.260797511 | 0.391048   | actp15             | phosphogly      | ENSG00000141494                                 |
| 645 | ENSLTFTG00 | 1.26048426  | 0.00018441 | actp3              | complex         | ENSG00000180966                                 |
| 646 | ENSLTFTG00 | 1.26195188  | 0.00074805 | act1a2             | colutea carr    | ENSG00000147100                                 |
| 647 | ENSLTFTG00 | 1.26153330  | 1.501181   | actm2              | matrix meta     | ENSG00000180103                                 |
| 648 | ENSLTFTG00 | 1.26083939  | 1.541048   | act1               | kinasec fam     | ENSG00000127649                                 |
| 649 | ENSLTFTG00 | 1.26062633  | 0.001113   | actp2              | membrane        | ENSG00000130966                                 |
| 650 | ENSLTFTG00 | 1.260180812 | 0.00061241 | actp18             | gene finger     | ENSG00000186484                                 |
| 651 | ENSLTFTG00 | 1.25866619  | 0.00013721 | ENSLTFTG0000021792 | ENSG00000127954 |                                                 |
| 652 | ENSLTFTG00 | 1.25879312  | 1.571048   | act1               | beta domain     | ENSG00000184666                                 |
| 653 | ENSLTFTG00 | 1.25811378  | 5.811048   | actm1a             | CSKX intera     | ENSG00000180971                                 |
| 654 | ENSLTFTG00 | 1.25047962  | 1.581048   | act1b2             | gene finger     | ENSG00000180966                                 |
| 655 | ENSLTFTG00 | 1.24812417  | 0.0011481  | ENSLTFTG0000021793 | ENSG00000180966 |                                                 |
| 656 | ENSLTFTG00 | 1.25141113  | 0.00277891 | act1               | actin like      | ENSG00000188061                                 |
| 657 | ENSLTFTG00 | 1.25002368  | 1.411048   | act1               | mediator        | ENSG00000170916                                 |
| 658 | ENSLTFTG00 | 1.248714229 | 0.0011921  | enr1a4             |                 | ENSG00000144619                                 |
| 659 | ENSLTFTG00 | 1.24808803  | 0.00010819 | enr1c2             | holmer scph     | ENSG00000119942                                 |
| 660 | ENSLTFTG00 | 1.24808803  | 0.00010819 | enr1c2             | CA proteo-      | ENSG00000119942                                 |
| 661 | ENSLTFTG00 | 1.24602745  | 7.771081   | act1               | myosin II       | ENSG00000187900                                 |
| 662 | ENSLTFTG00 | 1.24602745  | 7.771081   | act1               | myosin II       | ENSG00000175486                                 |
| 663 | ENSLTFTG00 | 1.24602745  | 7.771081   | act1               | myosin II       | ENSG00000184846                                 |
| 664 | ENSLTFTG00 | 1.24602745  | 7.771081   | act1               | myosin II       | ENSG00000184846                                 |
| 665 | ENSLTFTG00 | 1.24602745  | 7.771081   | act1               | myosin II       | ENSG00000184846                                 |
| 666 | ENSLTFTG00 | 1.24602745  | 7.771081   | act1               | myosin II       | ENSG00000184846                                 |
| 667 | ENSLTFTG00 | 1.24602745  | 7.771081   | act1               | myosin II       | ENSG00000184846                                 |
| 668 | ENSLTFTG00 | 1.24602745  | 7.771081   | act1               | myosin II       | ENSG00000184846                                 |
| 669 | ENSLTFTG00 | 1.24602745  | 7.771081   | act1               | myosin II       | ENSG00000184846                                 |
| 670 | ENSLTFTG00 | 1.24602745  | 7.771081   | act1               | myosin II       | ENSG00000184846                                 |
| 671 | ENSLTFTG00 | 1.24602745  | 7.771081   | act1               | myosin II       | ENSG00000184846                                 |
| 672 | ENSLTFTG00 | 1.24602745  | 7.771081   | act1               | myosin II       | ENSG00000184846                                 |
| 673 | ENSLTFTG00 | 1.24602745  | 7.771081   | act1               | myosin II       | ENSG00000184846                                 |
| 674 | ENSLTFTG00 | 1.24602745  | 7.771081   | act1               | myosin II       | ENSG00000184846                                 |
| 675 | ENSLTFTG00 | 1.24602745  | 7.771081   | act1               | myosin II       | ENSG00000184846                                 |
| 676 | ENSLTFTG00 | 1.24602745  | 7.771081   | act1               | myosin II       | ENSG00000184846                                 |
| 677 | ENSLTFTG00 | 1.24602745  | 7.771081   | act1               | myosin II       | ENSG00000184846                                 |
| 678 | ENSLTFTG00 | 1.24602745  | 7.771081   | act1               | myosin II       | ENSG00000184846                                 |
| 679 | ENSLTFTG00 | 1.24602745  | 7.771081   | act1               | myosin II       | ENSG00000184846                                 |
| 680 | ENSLTFTG00 | 1.24602745  | 7.771081   | act1               | myosin II       | ENSG00000184846                                 |
| 681 | ENSLTFTG00 | 1.24602745  | 7.771081   | act1               | myosin II       | ENSG00000184846                                 |
| 682 | ENSLTFTG00 | 1.24602745  | 7.771081   | act1               | myosin II       | ENSG00000184846                                 |
| 683 | ENSLTFTG00 | 1.24602745  | 7.771081   | act1               | myosin II       | ENSG00000184846                                 |
| 684 | ENSLTFTG00 | 1.24602745  | 7.771081   | act1               | myosin II       | ENSG00000184846                                 |
| 685 | ENSLTFTG00 | 1.24602745  | 7.771081   | act1               | myosin II       | ENSG00000184846                                 |
| 686 | ENSLTFTG00 | 1.24602745  | 7.771081   | act1               | myosin II       | ENSG00000184846                                 |
| 687 | ENSLTFTG00 | 1.24602745  | 7.771081   | act1               | myosin II       | ENSG00000184846                                 |
| 688 | ENSLTFTG00 | 1.24602745  | 7.771081   | act1               | myosin II       | ENSG00000184846                                 |
| 689 | ENSLTFTG00 | 1.24602745  | 7.771081   | act1               | myosin II       | ENSG00000184846                                 |
| 690 | ENSLTFTG00 | 1.24602745  | 7.771081   | act1               | myosin II       | ENSG00000184846                                 |
| 691 | ENSLTFTG00 | 1.24602745  | 7.771081   | act1               | myosin II       | ENSG00000184846                                 |
| 692 | ENSLTFTG00 | 1.24602745  | 7.771081   | act1               | myosin II       | ENSG00000184846                                 |
| 693 | ENSLTFTG00 | 1.24602745  | 7.771081   | act1               | myosin II       | ENSG00000184846                                 |
| 694 | ENSLTFTG00 | 1.24602745  | 7.771081   | act1               | myosin II       | ENSG00000184846                                 |
| 695 | ENSLTFTG00 | 1.24602745  | 7.771081   | act1               | myosin II       | ENSG00000184846                                 |
| 696 | ENSLTFTG00 | 1.24602745  | 7.771081   | act1               | myosin II       | ENSG00000184846                                 |
| 697 | ENSLTFTG00 | 1.24602745  | 7.771081   | act1               | myosin II       | ENSG00000184846                                 |
| 698 | ENSLTFTG00 | 1.24602745  | 7.771081   | act1               | myosin II       | ENSG00000184846                                 |
| 699 | ENSLTFTG00 | 1.24602745  | 7.771081   | act1               | myosin II       | ENSG00000184846                                 |
| 700 | ENSLTFTG00 | 1.24602745  | 7.771081   | act1               | myosin II       | ENSG00000184846                                 |
| 701 | ENSLTFTG00 | 1.24602745  | 7.771081   | act1               | myosin II       | ENSG00000184846                                 |
| 702 | ENSLTFTG00 | 1.24602745  | 7.771081   | act1               | myosin II       | ENSG00000184846                                 |
| 703 | ENSLTFTG00 | 1.24602745  | 7.771081   | act1               | myosin II       | ENSG00000184846                                 |
| 704 | ENSLTFTG00 | 1.24602745  | 7.771081   | act1               | myosin II       | ENSG00000184846                                 |
| 705 | ENSLTFTG00 |             |            |                    |                 |                                                 |

|     |         |                 |            |            |                   |                 |                 |
|-----|---------|-----------------|------------|------------|-------------------|-----------------|-----------------|
| 761 | ENSEMBL | ENSG00000176175 | 1168823454 | D0668784   | gpm33b            | protein-ahap    | ENSG00000176175 |
| 762 | ENSEMBL | ENSG00000176176 | 1169109251 | 11691104   | gpm33b            | MAP2K           | ENSG00000176176 |
| 763 | ENSEMBL | ENSG00000176177 | 1168838893 | 0303172929 | mgd               | myelin-axon     | ENSG00000176177 |
| 764 | ENSEMBL | ENSG00000176178 | 1168849373 | 2116134    | RP-GENE-37        | MED12/7876      | ENSG00000176178 |
| 765 | ENSEMBL | ENSG00000176179 | 1168828613 | 8408148    | hpl1              | gene            | ENSG00000176179 |
| 766 | ENSEMBL | ENSG00000176180 | 1168804961 | 1391391    | algpna            |                 | ENSG00000176180 |
| 767 | ENSEMBL | ENSG00000176181 | 1168848211 | 03031861   | mgd               | bone-matrix     | ENSG00000176181 |
| 768 | ENSEMBL | ENSG00000176182 | 1167781554 | 4236108    | emad4             | NME2/2          | ENSG00000176182 |
| 769 | ENSEMBL | ENSG00000176183 | 1166799382 | 9726396    | cyfip3            | cyfip3/drome    | ENSG00000176183 |
| 770 | ENSEMBL | ENSG00000176184 | 1166605253 | 5738111    | mpg4              | with-60-sec     | ENSG00000176184 |
| 771 | ENSEMBL | ENSG00000176185 | 1165439311 | 7368133    | gpm33b            | BPX nuclear     | ENSG00000176185 |
| 772 | ENSEMBL | ENSG00000176186 | 1164968384 | 1318102    | fnuc3             | mitochondr      | ENSG00000176186 |
| 773 | ENSEMBL | ENSG00000176187 | 1164574544 | 030002929  | tdgpa4            | single strand   | ENSG00000176187 |
| 774 | ENSEMBL | ENSG00000176188 | 116411312  | 4331110    | lbr               | CTL, centros    | ENSG00000176188 |
| 775 | ENSEMBL | ENSG00000176189 | 116429524  | 1171135    | Prme2             | PR2             | ENSG00000176189 |
| 776 | ENSEMBL | ENSG00000176190 | 1163934584 | 030512448  | deif7             | divinyl-ribose  | ENSG00000176190 |
| 777 | ENSEMBL | ENSG00000176191 | 1163984214 | 1271318    | fnuc11            |                 | ENSG00000176191 |
| 778 | ENSEMBL | ENSG00000176192 | 1163581817 | 03056138   | ENCKET00000048932 |                 | ENSG00000176192 |
| 779 | ENSEMBL | ENSG00000176193 | 1163419411 | 1471010    | snord5            | SN snorna       | ENSG00000176193 |
| 780 | ENSEMBL | ENSG00000176194 | 1162488709 | 3348188    | psid2             | protein-ahap    | ENSG00000176194 |
| 781 | ENSEMBL | ENSG00000176195 | 1162042684 | 5086108    | mab3a1            | mab3a1/act      | ENSG00000176195 |
| 782 | ENSEMBL | ENSG00000176196 | 1161828888 | 3368181    | dnas8             | DEAD/H-box      | ENSG00000176196 |
| 783 | ENSEMBL | ENSG00000176197 | 1161707783 | 2348134    | tm7212            | tm7myr          | ENSG00000176197 |
| 784 | ENSEMBL | ENSG00000176198 | 1160811011 | 030048112  | hpa               | enzyme-act      | ENSG00000176198 |
| 785 | ENSEMBL | ENSG00000176199 | 1160618469 | 030507373  | hpa31             | hpa31/act       | ENSG00000176199 |
| 786 | ENSEMBL | ENSG00000176200 | 1159488202 | 030013713  | prnc3a1           | prnc3a1/act     | ENSG00000176200 |
| 787 | ENSEMBL | ENSG00000176201 | 1158976211 | 030413448  | dupa1             | dual specific   | ENSG00000176201 |
| 788 | ENSEMBL | ENSG00000176202 | 1157849352 | 2301371    | mpf205            |                 | ENSG00000176202 |
| 789 | ENSEMBL | ENSG00000176203 | 1156778903 | 1326152    | mp2               | rhandrat        | ENSG00000176203 |
| 790 | ENSEMBL | ENSG00000176204 | 1156242377 | 7391091    | rhu6              | phosphobom      | ENSG00000176204 |
| 791 | ENSEMBL | ENSG00000176205 | 1156127614 | 1329121    | enm317            | transmembr      | ENSG00000176205 |
| 792 | ENSEMBL | ENSG00000176206 | 1155439944 | 2281001    | ENCKET00000012392 |                 | ENSG00000176206 |
| 793 | ENSEMBL | ENSG00000176207 | 1154917347 | 030041344  | ENCKET00000010308 |                 | ENSG00000176207 |
| 794 | ENSEMBL | ENSG00000176208 | 1154720317 | 2238001    | gpm12             | PH1 domain      | ENSG00000176208 |
| 795 | ENSEMBL | ENSG00000176209 | 1153131301 | 5151251    | gpm39             | TCDD induc      | ENSG00000176209 |
| 796 | ENSEMBL | ENSG00000176210 | 1152503809 | 030010338  | hpl1              | proteasome      | ENSG00000176210 |
| 797 | ENSEMBL | ENSG00000176211 | 1151916281 | 5021101    | ncm2              | mitochondr      | ENSG00000176211 |
| 798 | ENSEMBL | ENSG00000176212 | 115176225  | 1022       | hmgd              | hmgd/om         | ENSG00000176212 |
| 799 | ENSEMBL | ENSG00000176213 | 1151029726 | 1058108    | hmdc1             | medial-rib      | ENSG00000176213 |
| 800 | ENSEMBL | ENSG00000176214 | 1148414814 | 8366111    | lym1              | lym1/ubiquit    | ENSG00000176214 |
| 801 | ENSEMBL | ENSG00000176215 | 1146419614 | 1026108    | hmdc2             | ENCKET000000094 | ENSG00000176215 |
| 802 | ENSEMBL | ENSG00000176216 | 1146811285 | 1086111    | zfp813            | zinc-finger     | ENSG00000176216 |
| 803 | ENSEMBL | ENSG00000176217 | 1146752954 | 03051994   | ENCKET00000010177 |                 | ENSG00000176217 |
| 804 | ENSEMBL | ENSG00000176218 | 1146148881 | 1108118    | enm41             | endocytosis     | ENSG00000176218 |
| 805 | ENSEMBL | ENSG00000176219 | 1146500688 | 030021391  | hpl7              | subunit-tyro    | ENSG00000176219 |
| 806 | ENSEMBL | ENSG00000176220 | 1146179620 | 813121     | hpa2              | hpa2/act        | ENSG00000176220 |
| 807 | ENSEMBL | ENSG00000176221 | 1145738281 | 7588144    | hsm6b             | lysine-10       | ENSG00000176221 |
| 808 | ENSEMBL | ENSG00000176222 | 1145049469 | 0741101    | lcp1              | glycoprotein    | ENSG00000176222 |
| 809 | ENSEMBL | ENSG00000176223 | 1145181709 | 030048112  | hpa31             | hpa31/act       | ENSG00000176223 |
| 810 | ENSEMBL | ENSG00000176224 | 1144071611 | 8461091    | gpm392            |                 | ENSG00000176224 |
| 811 | ENSEMBL | ENSG00000176225 | 1143122028 | 030017091  | hpa32             | hpa32/act       | ENSG00000176225 |
| 812 | ENSEMBL | ENSG00000176226 | 114332252  | 2766118    | enm43             | transmembr      | ENSG00000176226 |
| 813 | ENSEMBL | ENSG00000176227 | 114179988  | 1318108    | ctd173            | CTD domain      | ENSG00000176227 |
| 814 | ENSEMBL | ENSG00000176228 | 1141695707 | 4275101    | hpa2              | enzyme-act      | ENSG00000176228 |
| 815 | ENSEMBL | ENSG00000176229 | 1141247788 | 8718101    | hsm63             | MEK4-like       | ENSG00000176229 |
| 816 | ENSEMBL | ENSG00000176230 | 1141148374 | 6458101    | hpa4              | hpa4/act        | ENSG00000176230 |
| 817 | ENSEMBL | ENSG00000176231 | 1140437671 | 5038118    | gpm1              | gpm1/act        | ENSG00000176231 |
| 818 | ENSEMBL | ENSG00000176232 | 1140162486 | 1186113    | hmdc1             | hmdc1/act       | ENSG00000176232 |
| 819 | ENSEMBL | ENSG00000176233 | 1139102761 | 03048389   | hpl2a1            | histone class   | ENSG00000176233 |
| 820 | ENSEMBL | ENSG00000176234 | 1138726513 | 030129462  | col12a1           | collagen-1a     | ENSG00000176234 |
| 821 | ENSEMBL | ENSG00000176235 | 1138415458 | 8486124    | enm2              | collagen-3      | ENSG00000176235 |
| 822 | ENSEMBL | ENSG00000176236 | 1137613737 | 1321101    | gpm1              | perlecanin      | ENSG00000176236 |
| 823 | ENSEMBL | ENSG00000176237 | 113653521  | 030001     | gpm3              | gpm3/act        | ENSG00000176237 |
| 824 | ENSEMBL | ENSG00000176238 | 1135070704 | 1926101    | hpl1              | amphiphilic     | ENSG00000176238 |
| 825 | ENSEMBL | ENSG00000176239 | 1131650118 | 2598177    | act3              | actin/gamma     | ENSG00000176239 |
| 826 | ENSEMBL | ENSG00000176240 | 1131437103 | 030014741  | hpl1              | hpl1/act        | ENSG00000176240 |
| 827 | ENSEMBL | ENSG00000176241 | 1132636632 | 1546124    | gpm6              | guanine-ate     | ENSG00000176241 |
| 828 | ENSEMBL | ENSG00000176242 | 113062201  | 4431139    | gpm32             | transmembr      | ENSG00000176242 |
| 829 | ENSEMBL | ENSG00000176243 | 1130116674 | 030048112  | hpa31             | hpa31/act       | ENSG00000176243 |
| 830 | ENSEMBL | ENSG00000176244 | 1129696981 | 030161291  | hpl7              | hpl7/act        | ENSG00000176244 |
| 831 | ENSEMBL | ENSG00000176245 | 1129626611 | 3348101    | gpm18             | transmembr      | ENSG00000176245 |
| 832 | ENSEMBL | ENSG00000176246 | 1128065163 | 333108     | enm43             | tumor-necro     | ENSG00000176246 |
| 833 | ENSEMBL | ENSG00000176247 | 1127591121 | 030040778  | hpl2              | hpl2/act        | ENSG00000176247 |
| 834 | ENSEMBL | ENSG00000176248 | 1127291182 | 030062484  | hpl2              | hpl2/act        | ENSG00000176248 |
| 835 | ENSEMBL | ENSG00000176249 | 1126476121 | 030083838  | hpl1              | K-raz-actin     | ENSG00000176249 |
| 836 | ENSEMBL | ENSG00000176250 | 1125388678 | 6105101    | hpl1              | hpl1/act        | ENSG00000176250 |
| 837 | ENSEMBL | ENSG00000176251 | 112484268  | 030104768  | hpl1              | hpl1/act        | ENSG00000176251 |
| 838 | ENSEMBL | ENSG00000176252 | 112489245  | 030100048  | hpl1              | hpl1/act        | ENSG00000176252 |
| 839 | ENSEMBL | ENSG00000176253 | 1124197561 | 7286144    | hpl1              | hpl1/act        | ENSG00000176253 |
| 840 | ENSEMBL | ENSG00000176254 | 1124232933 | 030029251  | hpl1              | hpl1/act        | ENSG00000176254 |
| 841 | ENSEMBL | ENSG00000176255 | 1123188021 | 6105101    | hpl1              | hpl1/act        | ENSG00000176255 |
| 842 | ENSEMBL | ENSG00000176256 | 112149356  | 3411411    | hpl1              | hpl1/act        | ENSG00000176256 |
| 843 | ENSEMBL | ENSG00000176257 | 112097208  | 1096121    | ctd173            | CTD domain      | ENSG00000176257 |
| 844 | ENSEMBL | ENSG00000176258 | 1120791241 | 3411131    | hpl1              | hpl1/act        | ENSG00000176258 |
| 845 | ENSEMBL | ENSG00000176259 | 1120734711 | 030136242  | hpl7              | hpl7/act        | ENSG00000176259 |
| 846 | ENSEMBL | ENSG00000176260 | 1120266621 | 2181112    | hpl1              | hpl1/act        | ENSG00000176260 |
| 847 | ENSEMBL | ENSG00000176261 | 1118646021 | 1361131    | hpl1              | hpl1/act        | ENSG00000176261 |
| 848 | ENSEMBL | ENSG00000176262 | 1116530201 | 1046101    | ctd188            | ctd188/act      | ENSG00000176262 |
| 849 | ENSEMBL | ENSG00000176263 | 1115726804 | 030083838  | hpl1              | hpl1/act        | ENSG00000176263 |
| 850 | ENSEMBL | ENSG00000176264 | 1115541513 | 1571408    | hpl1              | hpl1/act        | ENSG00000176264 |
| 851 | ENSEMBL | ENSG00000176265 | 1115062486 | 030013626  | hpl1              | hpl1/act        | ENSG00000176265 |
| 852 | ENSEMBL | ENSG00000176266 | 1115047457 | 1596104    | enm2              | helic-enzyme    | ENSG00000176266 |
| 853 | ENSEMBL | ENSG00000176267 | 1115039973 | 1598108    | enm2              | helic-enzyme    | ENSG00000176267 |
| 854 | ENSEMBL | ENSG00000176268 | 1114716248 | 030048112  | hpa31             | hpa31/act       | ENSG00000176268 |
| 855 | ENSEMBL | ENSG00000176269 | 1114276938 | 8261218    | hpl1              | hpl1/act        | ENSG00000176269 |
| 856 | ENSEMBL | ENSG00000176270 | 1114007181 | 1016101    | hpl1              | hpl1/act        | ENSG00000176270 |
| 857 | ENSEMBL | ENSG00000176271 | 111390789  | 3581111    | hpl1              | hpl1/act        | ENSG00000176271 |
| 858 | ENSEMBL | ENSG00000176272 | 111379784  | 030047808  | lcp1              | lcp1/act        | ENSG00000176272 |
| 859 | ENSEMBL | ENSG00000176273 | 1111419147 | 8166111    | hpl1              | hpl1/act        | ENSG00000176273 |
| 860 | ENSEMBL | ENSG00000176274 | 1111412088 | 1631111    | ENCKET00000023927 |                 | ENSG00000176274 |
| 861 | ENSEMBL | ENSG00000176275 | 1111294484 | 515101     | ctd1              | CTD-like        | ENSG00000176275 |
| 862 | ENSEMBL | ENSG00000176276 | 111128608  | 21081204   | col2a2            | collagen, type  | ENSG00000176276 |
| 863 | ENSEMBL | ENSG00000176277 | 1111210107 | 030024242  | gpm30             |                 | ENSG00000176277 |
| 864 | ENSEMBL | ENSG00000176278 | 1110447472 | 030092918  | hpl2              | hpl2/act        | ENSG00000176278 |
| 865 | ENSEMBL | ENSG00000176279 | 110974878  | 030010331  | hpl1              | hpl1/act        | ENSG00000176279 |
| 866 | ENSEMBL | ENSG00000176280 | 110879768  | 4079123    | hpl1              | hpl1/act        | ENSG00000176280 |
| 867 | ENSEMBL | ENSG00000176281 | 1107648111 | 370101     | hpl1              | hpl1/act        | ENSG00000176281 |
| 868 | ENSEMBL | ENSG00000176282 | 110730498  | 1479108    | hpl1              | hpl1/act        | ENSG00000176282 |
| 869 | ENSEMBL | ENSG00000176283 | 1106939917 | 2558101    | hpl1              | hpl1/act        | ENSG00000176283 |
| 870 | ENSEMBL | ENSG00000176284 | 1106237414 | 7681132    | hpl1              | hpl1/act        | ENSG00000176284 |
| 871 | ENSEMBL | ENSG00000176285 | 1105864417 | 4196101    | hpl1              | hpl1/act        | ENSG00000176285 |
| 872 | ENSEMBL | ENSG00000176286 | 1104885881 | 433108     | hpl1              | hpl1/act        | ENSG00000176286 |
| 873 | ENSEMBL | ENSG00000176287 | 110465783  | 5481134    | gpm3              | hpl1-2-prote    | ENSG00000176287 |
| 874 | ENSEMBL | ENSG00000176288 | 110376988  | 030483838  | hpl1              | hpl1/act        | ENSG00000176288 |
| 875 | ENSEMBL | ENSG00000176289 | 110266244  | 466108     | hpl1              | hpl1/act        | ENSG00000176289 |
| 876 | ENSEMBL | ENSG00000176290 | 1101798111 | 746108     | hpl1              | hpl1/act        | ENSG00000176290 |
| 877 | ENSEMBL | ENSG00000176291 | 1101431569 | 030027777  | hpl1              | hpl1/act        | ENSG00000176291 |
| 878 | ENSEMBL | ENSG00000176292 | 110066203  | 030091331  | hpl1              | hpl1/act        | ENSG00000176292 |
| 879 | ENSEMBL | ENSG00000176293 | 110016442  | 1318101    | hpl1              | hpl1/act        | ENSG00000176293 |
| 880 | ENSEMBL | ENSG00000176294 | 109941556  | 1126121    | hpl1              | hpl1/act        | ENSG00000176294 |
| 881 | ENSEMBL | ENSG00000176295 | 10984651   | 03001792   | gpm11             |                 |                 |





|      |         |                      |           |                      |                                                                                          |                                                                                     |
|------|---------|----------------------|-----------|----------------------|------------------------------------------------------------------------------------------|-------------------------------------------------------------------------------------|
| 1327 | ENSEMBL | ENSG000001205062073  | ccn3      | carbonic dehydratase | ENSG00000144410                                                                          |                                                                                     |
| 1328 | ENSEMBL | ENSG000001205087024  | 156b-40   | ncf1                 | chromatin                                                                                | ENSG00000149448                                                                     |
| 1329 | ENSEMBL | ENSG00000120738923   | 186E-180  | kb gene 10           | plasticity ori                                                                           | ENSG00000165105                                                                     |
| 1330 | ENSEMBL | ENSG000001207906313  | 177E-08   | mybl2                | chromatin                                                                                | ENSG00000176688                                                                     |
| 1331 | ENSEMBL | ENSG000001209050179  | 120E-01   | mybl2                | neurogenesis                                                                             | ENSG00000180111                                                                     |
| 1332 | ENSEMBL | ENSG000001212616458  | 621E-13   | sdmy1                | adhesion G                                                                               | ENSG00000164199                                                                     |
| 1333 | ENSEMBL | ENSG000001212505068  | 67E-25    | mybl3                | protein arg                                                                              | ENSG00000180378                                                                     |
| 1334 | ENSEMBL | ENSG000001217532614  | 709E-15   | myo40                | fibronectin                                                                              | ENSG00000147487                                                                     |
| 1335 | ENSEMBL | ENSG000001226378723  | 644E-04   | myo7B                | chromosome                                                                               | ENSG00000179274                                                                     |
| 1336 | ENSEMBL | ENSG000001229232362  | 479E-22   | myo7C                | interleukin 1                                                                            | ENSG00000134070                                                                     |
| 1337 | ENSEMBL | ENSG000001229446553  | 241E-83   | myo3                 | SRB1 homo                                                                                | ENSG00000168771                                                                     |
| 1338 | ENSEMBL | ENSG000001230244017  | 114E-18   | myo3                 | thymocyte                                                                                | ENSG00000151040                                                                     |
| 1339 | ENSEMBL | ENSG000001230497182  | 230E-115  | myo3r2               | BUS23, HRN                                                                               | ENSG00000171462                                                                     |
| 1340 | ENSEMBL | ENSG000001231783444  | 020144722 | myo2                 | protein kinase                                                                           | ENSG00000188668                                                                     |
| 1341 | ENSEMBL | ENSG000001231819211  | 6E-28     | myo3                 | ribonucleo                                                                               | ENSG00000189688                                                                     |
| 1342 | ENSEMBL | ENSG000001233032074  | 376E-51   | myo6b1               | serum negat                                                                              | ENSG00000151304                                                                     |
| 1343 | ENSEMBL | ENSG000001233262622  | 402E-29   | myo6b1               | myo6b1                                                                                   | ENSG00000189318                                                                     |
| 1344 | ENSEMBL | ENSG0000012424386265 | 117E-09   | myo1                 | interferon I                                                                             | ENSG00000204010, ENSG00000185745, ENSG00000119917, ENSG00000152778, ENSG00000119922 |
| 1345 | ENSEMBL | ENSG000001242809297  | 0         | myo1                 | fibroblast                                                                               | ENSG00000170868                                                                     |
| 1346 | ENSEMBL | ENSG000001245218051  | 404E-43   | myo1                 | myoepithel                                                                               | ENSG00000147795                                                                     |
| 1347 | ENSEMBL | ENSG000001246448558  | 331E-08   | myo17b               | colony cell                                                                              | ENSG000001701194                                                                    |
| 1348 | ENSEMBL | ENSG000001252362884  | 0         | myo1                 | phorbol                                                                                  | ENSG00000177727                                                                     |
| 1349 | ENSEMBL | ENSG000001252364884  | 0         | myo1                 | phorbol                                                                                  | ENSG00000226597                                                                     |
| 1350 | ENSEMBL | ENSG000001256014568  | 239E-199  | myo1                 | neuronal prec                                                                            | ENSG00000111899                                                                     |
| 1351 | ENSEMBL | ENSG000001257497053  | 0         | myo13                | neuronal A1                                                                              | ENSG00000189487                                                                     |
| 1352 | ENSEMBL | ENSG000001257676747  | 134E-91   | myo1                 | cytokine                                                                                 | ENSG00000114737                                                                     |
| 1353 | ENSEMBL | ENSG000001258202001  | 0         | myo1                 | plate-like cell                                                                          | ENSG00000170466                                                                     |
| 1354 | ENSEMBL | ENSG000001259151332  | 154E-87   | myo2                 | MAP kinase                                                                               | ENSG00000109875                                                                     |
| 1355 | ENSEMBL | ENSG000001259992066  | 0         | myo2                 | secretory post                                                                           | ENSG00000196611, ENSG00000233006                                                    |
| 1356 | ENSEMBL | ENSG000001262099020  | 0         | myo4                 | thrombol                                                                                 | ENSG00000186975                                                                     |
| 1357 | ENSEMBL | ENSG000001264804847  | 121E-49   | myo1                 | glutamate                                                                                | ENSG00000120109                                                                     |
| 1358 | ENSEMBL | ENSG000001264905318  | 129E-08   | myo1                 | polymerase                                                                               | ENSG00000140911                                                                     |
| 1359 | ENSEMBL | ENSG000001267852404  | 327E-21   | myo25                | RNA exonu                                                                                | ENSG00000105189                                                                     |
| 1360 | ENSEMBL | ENSG000001271442013  | 524E-81   | myo25                | transmembr                                                                               | ENSG00000117680                                                                     |
| 1361 | ENSEMBL | ENSG000001271497144  | 240E-81   | myo2                 | death assoc                                                                              | ENSG00000193664                                                                     |
| 1362 | ENSEMBL | ENSG000001271442473  | 558E-13   | myo25                | myo25                                                                                    | ENSG00000181299                                                                     |
| 1363 | ENSEMBL | ENSG000001273552729  | 0         | myo1                 | colony cell                                                                              | ENSG00000119188                                                                     |
| 1364 | ENSEMBL | ENSG000001274425284  | 130E-224  | myo1                 | ENCKET00000028980                                                                        | ENSG00000100647                                                                     |
| 1365 | ENSEMBL | ENSG000001274797203  | 262E-23   | myo1                 | MG2b part                                                                                | ENSG00000189688                                                                     |
| 1366 | ENSEMBL | ENSG000001277481788  | 651E-08   | myo1                 | ENCKET00000010028                                                                        | ENSG00000196688                                                                     |
| 1367 | ENSEMBL | ENSG000001282426205  | 620E-105  | myo1                 | actin                                                                                    | ENSG00000130119                                                                     |
| 1368 | ENSEMBL | ENSG000001284781763  | 140E-14   | myo1                 | protein                                                                                  | ENSG00000177196, ENSG00000100033                                                    |
| 1369 | ENSEMBL | ENSG000001286429409  | 0         | myo13                | zinc finger                                                                              | ENSG00000142684                                                                     |
| 1370 | ENSEMBL | ENSG000001286899204  | 0         | myo1                 | myo1                                                                                     | ENSG00000186763                                                                     |
| 1371 | ENSEMBL | ENSG000001293199111  | 589E-20   | myo4                 | RNA and                                                                                  | ENSG00000176666, ENSG00000133081, ENSG00000119999                                   |
| 1372 | ENSEMBL | ENSG000001295126879  | 483E-21   | myo4                 | receptor                                                                                 | ENSG00000181421                                                                     |
| 1373 | ENSEMBL | ENSG000001296477741  | 140E-1    | myo1                 | act. mem-32                                                                              | ENSG00000107943                                                                     |
| 1374 | ENSEMBL | ENSG000001298263371  | 0         | myo4                 | GTP binding                                                                              | ENSG00000107937                                                                     |
| 1375 | ENSEMBL | ENSG000001298917274  | 0         | myo4                 | CD302/CD3                                                                                | ENSG00000179961                                                                     |
| 1376 | ENSEMBL | ENSG000001303294263  | 0         | myo1                 | myo1                                                                                     | ENSG00000178812                                                                     |
| 1377 | ENSEMBL | ENSG000001305279811  | 0         | myo1                 | ENCKET00000020482                                                                        | ENSG00000100475                                                                     |
| 1378 | ENSEMBL | ENSG000001305405178  | 0         | myo1                 | myo1                                                                                     | ENSG00000100436                                                                     |
| 1379 | ENSEMBL | ENSG00000130658139   | 350E-54   | myo1                 | DNA depend                                                                               | ENSG00000146384                                                                     |
| 1380 | ENSEMBL | ENSG000001307889863  | 213E-91   | myo1                 | chromosome                                                                               | ENSG00000155930                                                                     |
| 1381 | ENSEMBL | ENSG000001312491124  | 228E-44   | myo1                 | RNA and                                                                                  | ENSG00000177196, ENSG00000198874                                                    |
| 1382 | ENSEMBL | ENSG000001315083112  | 556E-09   | myo1                 | neuronal                                                                                 | ENSG0000011129                                                                      |
| 1383 | ENSEMBL | ENSG000001315124619  | 0         | myo1                 | ENCKET00000007236                                                                        | ENSG00000199617                                                                     |
| 1384 | ENSEMBL | ENSG000001320653558  | 600002971 | myo1                 | CD206 rece                                                                               | ENSG00000140113, ENSG00000111594                                                    |
| 1385 | ENSEMBL | ENSG000001320759621  | 0         | myo1                 | myo1                                                                                     | ENSG00000189688                                                                     |
| 1386 | ENSEMBL | ENSG000001325648454  | 440E-13   | myo1                 | myo1                                                                                     | ENSG00000170868                                                                     |
| 1387 | ENSEMBL | ENSG000001326800606  | 829E-298  | myo1                 | CTCF type                                                                                | ENSG00000187766, ENSG00000109714                                                    |
| 1388 | ENSEMBL | ENSG000001327676449  | 555E-10   | myo1                 | TRF subunit                                                                              | ENSG00000161633                                                                     |
| 1389 | ENSEMBL | ENSG000001328927431  | 647E-05   | myo1                 | ENSG00000227085                                                                          |                                                                                     |
| 1390 | ENSEMBL | ENSG000001329181187  | 679E-103  | myo1                 | SRB1 homo                                                                                | ENSG00000199447                                                                     |
| 1391 | ENSEMBL | ENSG000001330991167  | 439E-103  | myo1                 | glutamate                                                                                | ENSG00000193664                                                                     |
| 1392 | ENSEMBL | ENSG000001331861812  | 020117647 | myo1                 | ENCKET00000028622                                                                        | ENSG00000186222                                                                     |
| 1393 | ENSEMBL | ENSG000001331867212  | 0         | myo1                 | thrombol                                                                                 | ENSG00000115368                                                                     |
| 1394 | ENSEMBL | ENSG000001339275114  | 639E-11   | myo1                 | distal mem                                                                               | ENSG00000105417                                                                     |
| 1395 | ENSEMBL | ENSG000001344076033  | 102E-4    | myo1                 | TRF PA type                                                                              | ENSG00000124227                                                                     |
| 1396 | ENSEMBL | ENSG000001344291729  | 139E-301  | myo1                 | thrombol                                                                                 | ENSG00000199921                                                                     |
| 1397 | ENSEMBL | ENSG000001345183762  | 154E-18   | myo3                 | RNA polIII                                                                               | ENSG00000154743                                                                     |
| 1398 | ENSEMBL | ENSG000001347176141  | 020071463 | myo1                 | ENCKET0000000021295, ENSG00000121265, ENSG00000121438, ENSG00000121125, ENSG000001221145 |                                                                                     |
| 1399 | ENSEMBL | ENSG000001349483757  | 0         | myo14                | myo14                                                                                    | ENSG00000194529                                                                     |
| 1400 | ENSEMBL | ENSG000001350426296  | 0         | myo1                 | Primer-Bind                                                                              | ENSG00000149688                                                                     |
| 1401 | ENSEMBL | ENSG000001355394009  | 134E-54   | myo1                 | myo1                                                                                     | ENSG00000197496                                                                     |
| 1402 | ENSEMBL | ENSG000001355790818  | 540E-89   | myo1                 | cytochal                                                                                 | ENSG00000124215                                                                     |
| 1403 | ENSEMBL | ENSG000001358461128  | 209E-20   | myo1                 | zinc finger                                                                              | ENSG00000194517                                                                     |
| 1404 | ENSEMBL | ENSG000001359846789  | 509E-28   | myo1                 | adenosine                                                                                | ENSG00000186803                                                                     |
| 1405 | ENSEMBL | ENSG000001361582213  | 793E-94   | myo1                 | MTF prote                                                                                | ENSG00000118513                                                                     |
| 1406 | ENSEMBL | ENSG000001362821132  | 675E-71   | myo1                 | DNA, C                                                                                   | ENSG00000194688                                                                     |
| 1407 | ENSEMBL | ENSG000001362705889  | 258E-119  | myo1                 | actin                                                                                    | ENSG00000187462                                                                     |
| 1408 | ENSEMBL | ENSG000001362876433  | 159E-153  | myo1                 | myo1                                                                                     | ENSG00000164913                                                                     |
| 1409 | ENSEMBL | ENSG000001362826914  | 280E-249  | myo1                 | KIAA1191                                                                                 | ENSG00000122203                                                                     |
| 1410 | ENSEMBL | ENSG000001371131102  | 512E-54   | myo1                 | myo1                                                                                     | ENSG00000140988                                                                     |
| 1411 | ENSEMBL | ENSG000001371311029  | 0         | myo1                 | myo1                                                                                     | ENSG00000140975                                                                     |
| 1412 | ENSEMBL | ENSG000001373661107  | 102E-207  | myo2                 | actin                                                                                    | ENSG00000109136                                                                     |
| 1413 | ENSEMBL | ENSG000001373711894  | 179E-256  | myo1                 | myo1                                                                                     | ENSG00000130920                                                                     |
| 1414 | ENSEMBL | ENSG000001375389213  | 148E-03   | myo2                 | neuropept                                                                                | ENSG00000162931                                                                     |
| 1415 | ENSEMBL | ENSG000001390697133  | 247E-91   | myo2                 | myo1                                                                                     | ENSG00000134046                                                                     |
| 1416 | ENSEMBL | ENSG000001393050031  | 483E-89   | myo1                 | actin                                                                                    | ENSG00000133976                                                                     |
| 1417 | ENSEMBL | ENSG000001393348173  | 534E-07   | myo1                 | myo1                                                                                     | ENSG00000155661                                                                     |
| 1418 | ENSEMBL | ENSG000001396253335  | 849E-15   | myo1                 | myo1                                                                                     | ENSG00000154663                                                                     |
| 1419 | ENSEMBL | ENSG000001396787765  | 185E-11   | myo1                 | stimulat                                                                                 | ENSG00000137868                                                                     |
| 1420 | ENSEMBL | ENSG000001398695311  | 0         | myo1                 | myo1                                                                                     | ENSG00000187773                                                                     |
| 1421 | ENSEMBL | ENSG000001400869099  | 366E-33   | myo1                 | myo1                                                                                     | ENSG00000137868                                                                     |
| 1422 | ENSEMBL | ENSG000001400259439  | 638E-142  | myo1                 | carboxyl                                                                                 | ENSG00000140263                                                                     |
| 1423 | ENSEMBL | ENSG000001401019326  | 638E-80   | myo1                 | calyculin                                                                                | ENSG00000116161                                                                     |
| 1424 | ENSEMBL | ENSG000001406646405  | 0         | myo1                 | palmitoyl                                                                                | ENSG00000131238                                                                     |
| 1425 | ENSEMBL | ENSG000001408973603  | 0         | myo1                 | partner of                                                                               | ENSG00000115946                                                                     |
| 1426 | ENSEMBL | ENSG000001412633434  | 020075564 | myo1                 | ENCKET00000000208                                                                        | ENSG00000140244, ENSG00000146333, ENSG00000144474, ENSG00000124135                  |
| 1427 | ENSEMBL | ENSG000001415811249  | 468E-110  | myo1                 | transmem                                                                                 | ENSG00000119121                                                                     |
| 1428 | ENSEMBL | ENSG000001416202477  | 127E-71   | myo2                 | actin                                                                                    | ENSG00000178903                                                                     |
| 1429 | ENSEMBL | ENSG000001417424227  | 105E-15   | myo2                 | neuronal PA                                                                              | ENSG00000170485                                                                     |
| 1430 | ENSEMBL | ENSG00000142116020   | 140E-91   | myo1                 | actin                                                                                    | ENSG00000186811                                                                     |
| 1431 | ENSEMBL | ENSG000001427243444  | 902E-11   | myo1                 | TRF alpha                                                                                | ENSG00000197971                                                                     |
| 1432 | ENSEMBL | ENSG000001430226661  | 501E-44   | myo1                 | myo1                                                                                     | ENSG00000102488                                                                     |
| 1433 | ENSEMBL | ENSG000001431187439  | 0         | myo1                 | actin                                                                                    | ENSG00000196225                                                                     |
| 1434 | ENSEMBL | ENSG000001432734441  | 546E-79   | myo1                 | cytochal                                                                                 | ENSG00000144882                                                                     |
| 1435 | ENSEMBL | ENSG000001436407824  | 347E-08   | myo1                 | cytochal                                                                                 | ENSG0000010496                                                                      |
| 1436 | ENSEMBL | ENSG000001437153329  | 741E-36   | myo1                 | ENCKET00000013555                                                                        | ENSG00000196688                                                                     |
| 1437 | ENSEMBL | ENSG000001441629264  | 431E-08   | myo1                 | SLAM Fam                                                                                 | ENSG00000138714                                                                     |
| 1438 | ENSEMBL | ENSG000001446219318  | 509E-28   | myo1                 | actin                                                                                    | ENSG00000196688                                                                     |
| 1439 | ENSEMBL | ENSG000001447928838  | 209E-21   | myo1                 | Pin-1                                                                                    | ENSG00000137193                                                                     |
| 1440 | ENSEMBL | ENSG000001452454514  | 237E-184  | my1                  | actin                                                                                    | ENSG00000196688                                                                     |
| 1441 | ENSEMBL | ENSG000001455019147  | 0         | myo1                 | actin                                                                                    | ENSG0000017310                                                                      |
| 1442 | ENSEMBL | ENSG000001455887119  | 020048482 | myo1                 | actin                                                                                    | ENSG00000196688                                                                     |
| 1443 | ENSEMBL | ENSG000001458141101  | 020042201 | myo1                 | polymerase                                                                               | ENSG00000180997                                                                     |
| 1444 | ENSEMBL | ENSG000001460158252  | 287E-40   | myo1                 | polymerase                                                                               | ENSG00000199624                                                                     |
| 1445 | ENSEMBL | ENSG000001471346813  | 743E-66   | my1                  | SRB1 homo                                                                                | ENSG00000196688                                                                     |
| 1446 | ENSEMBL | ENSG000001474110247  | 233E-36   | myo1                 | ENCKET00000020216                                                                        | ENSG00000144893                                                                     |
| 1447 | ENSEMBL | ENSG000001474311877  | 0         | myo1                 | thrombol                                                                                 | ENSG00000144894                                                                     |
| 1448 | ENSEMBL | ENSG000001477272242  | 118E-301  | myo1                 | DNA damag                                                                                | ENSG00000175197                                                                     |
| 1449 | ENSEMBL | ENSG000001481789863  | 120E-34   | myo1                 | ENCKET00000020216                                                                        | ENSG00000144882                                                                     |
| 1450 | ENSEMBL | ENSG000001495493702  | 640E-46   | myo1                 | ENCKET00000007139                                                                        | ENSG00000184881                                                                     |
| 1451 | ENSEMBL | ENSG000001505158297  | 228E-29   | myo1                 | Forma with                                                                               | ENSG00000171482                                                                     |
| 1452 | ENSEMBL | ENSG000001508291516  | 613E-23   | myo2                 | case                                                                                     | ENSG00000103190                                                                     |
| 1453 | ENSEMBL | ENSG0000015117558101 | 721E-51   | myo1                 | serine                                                                                   | ENSG00000196642                                                                     |
| 1454 | ENSEMBL | ENSG000001520767421  | 0         | myo1                 | fibroblast                                                                               | ENSG00000117976                                                                     |
| 1455 | ENSEMBL | ENSG000001525139812  | 0         | myo2                 | myo1                                                                                     | ENSG00000144124                                                                     |
| 1456 | ENSEMBL | ENSG000001525734851  | 020017824 | myo1                 | actin                                                                                    | ENSG00000144124                                                                     |
| 1457 | ENSEMBL | ENSG000001530013851  | 256E-05   | myo1                 | actin                                                                                    | ENSG00000137220                                                                     |
| 1458 | ENSEMBL | ENSG000001533494227  | 0         | myo1                 | TRF3                                                                                     | ENSG00000142496                                                                     |
| 1459 | ENSEMBL | ENSG000001538899597  | 739E-286  | myo2                 | TRF3                                                                                     | ENSG00000142496                                                                     |
| 1460 | ENSEMBL | ENSG000001542314088  | 509E-77   | myo1                 | GRAM dom                                                                                 | ENSG00000150324                                                                     |
| 1461 | ENSEMBL | ENSG000001546408934  | 440E-21   | myo1                 | actin                                                                                    |                                                                                     |



|      |           |              |           |                     |               |                                                                                                                                                                                          |
|------|-----------|--------------|-----------|---------------------|---------------|------------------------------------------------------------------------------------------------------------------------------------------------------------------------------------------|
| 1511 | ENMETFG00 | -1.88105508  | 2.638-21  | accopl              | non-specific  | ENSG00000188905                                                                                                                                                                          |
| 1512 | ENMETFG00 | -1.88818301  | 0         | dele                | ribosomal     | ENSG00000179445                                                                                                                                                                          |
| 1513 | ENMETFG00 | -1.89654282  | 2.518-124 | ENCMETG000000031156 |               | ENSG00000209693                                                                                                                                                                          |
| 1514 | ENMETFG00 | -1.94030263  | 1.883-96  | OTM1                | OTM1          | ENSG00000156346,ENSG00000040234                                                                                                                                                          |
| 1515 | ENMETFG00 | -1.94837783  | 3.885-125 | hsc21               | hsc21         | ENSG00000130833                                                                                                                                                                          |
| 1516 | ENMETFG00 | -1.94991933  | 0         | ac3h12a             | hinc fragar   | ENSG00000143874                                                                                                                                                                          |
| 1517 | ENMETFG00 | -1.95479611  | 6.151-42  | dele                | hinc polyd    | ENSG00000149006                                                                                                                                                                          |
| 1518 | ENMETFG00 | -2.054095282 | 2.002-42  | hsc90aa1.1          | heat shock    | ENSG00000086824                                                                                                                                                                          |
| 1519 | ENMETFG00 | -2.0699638   | 7.728-09  | actb18              | actb          | ENSG00000047436                                                                                                                                                                          |
| 1520 | ENMETFG00 | -2.13379743  | 0         | ENMETFG000000000314 |               | ENSG00000144440                                                                                                                                                                          |
| 1521 | ENMETFG00 | -2.14656543  | 8.138-302 | ENMETFG000000030746 |               | ENSG00000046602,ENSG00000016490,ENSG000000117975                                                                                                                                         |
| 1522 | ENMETFG00 | -2.205680874 | 0         | dele                | hinc polyd    | ENSG00000150158                                                                                                                                                                          |
| 1523 | ENMETFG00 | -2.208470607 | 1.188-105 | ENCMETG000000030099 |               | ENSG00000188886                                                                                                                                                                          |
| 1524 | ENMETFG00 | -2.22012966  | 0         | dele                | hinc polyd    | ENSG00000016490,ENSG000000117975                                                                                                                                                         |
| 1525 | ENMETFG00 | -2.22645197  | 6.041-18  | hsc70               | hsc70         | ENSG00000146890                                                                                                                                                                          |
| 1526 | ENMETFG00 | -2.28445624  | 8.602-09  | hsc28               | hinc histat   | ENSG00000146857                                                                                                                                                                          |
| 1527 | ENMETFG00 | -2.29812138  | 7.538-09  | hsc113              | hinc hist     | ENSG00000144607                                                                                                                                                                          |
| 1528 | ENMETFG00 | -2.400464996 | 4.062-10  | act7a11             | globule carri | ENSG00000151012                                                                                                                                                                          |
| 1529 | ENMETFG00 | -2.421099338 | 0         | hsc61               | hsc61         | ENSG00000184608                                                                                                                                                                          |
| 1530 | ENMETFG00 | -2.44001658  | 0         | ENMETFG000000000740 |               | ENSG00000180860                                                                                                                                                                          |
| 1531 | ENMETFG00 | -2.462700114 | 4.842-12  | ENCMETG000000030989 |               | ENSG00000183917                                                                                                                                                                          |
| 1532 | ENMETFG00 | -1.53081128  | 9.335-12  | hsc41               | hinc polyd    | ENSG00000178878                                                                                                                                                                          |
| 1533 | ENMETFG00 | -2.790533884 | 0         | dele                | low density   | ENSG00000180164                                                                                                                                                                          |
| 1534 | ENMETFG00 | -2.80603094  | 1.931-54  | hsc71               | hinc histat   | ENSG00000152744                                                                                                                                                                          |
| 1535 | ENMETFG00 | -2.835389374 | 2.931-18  | hsc50               | hinc polyd    | ENSG00000146795,ENSG00000178809,ENSG000000155428                                                                                                                                         |
| 1536 | ENMETFG00 | -2.910721613 | 2.802-118 | hsc28a3             | hinc polyd    | ENSG00000100078                                                                                                                                                                          |
| 1537 | ENMETFG00 | -1.941384445 | 0         | dele                | heat specific | ENSG00000130129                                                                                                                                                                          |
| 1538 | ENMETFG00 | -3.19549002  | 2.211-62  | hsc28a3             | fibroblast    | ENSG00000137440                                                                                                                                                                          |
| 1539 | ENMETFG00 | -3.17726402  | 8.242-191 | otm1                | hinc polyd    | ENSG00000169861                                                                                                                                                                          |
| 1540 | ENMETFG00 | -3.178201781 | 7.391-99  | hsc70               | heat shock    | ENSG00000173110,ENSG000000204389,ENSG000000204390,ENSG000000204388                                                                                                                       |
| 1541 | ENMETFG00 | -3.444211601 | 1.081-44  | hsc91               | heat shock    | ENSG00000173110,ENSG000000204389,ENSG000000204390,ENSG000000204388                                                                                                                       |
| 1542 | ENMETFG00 | -3.864311801 | 3.303-112 | hsc91b              | heat shock    | ENSG00000173110,ENSG000000204389,ENSG000000204390,ENSG000000204388                                                                                                                       |
| 1543 | ENMETFG00 | -4.45479284  | 3.862-101 | hsc41               | hinc histat   | ENSG00000136881                                                                                                                                                                          |
| 1544 | ENMETFG00 | -6.01118912  | 3.174-199 | hsc21               | hinc polyd    | ENSG00000136274,ENSG00000077038,ENSG000000112134,ENSG000000109181,ENSG000000107888,ENSG000000073610,ENSG000000135210,ENSG000000196620,ENSG000000127171,ENSG000000158096,ENSG000000011739 |
| 1545 | ENMETFG00 | -3.454284611 | 1.225-158 | hsc51               | hinc polyd    | ENSG00000096491,ENSG000000148834                                                                                                                                                         |
