# Supplementary material
Source: PubMed Central journal article supplement (PMC7840310)
Supplement: Supp_Table4.pdf [file Supp_Table4.pdf]

**Supplemental Table 4. Cell proliferation- and apoptotic process-related genes regulated by TRa**

| Apoptotic process         |                  | Stem cell regulation                                                            |                  | Cell proliferation |                  |
|---------------------------|------------------|---------------------------------------------------------------------------------|------------------|--------------------|------------------|
| GO:1904019 and GO:0006915 |                  | GO:0048864, GO:0036335,<br>GO:0019827, GO:0072089,<br>GO:0072091 and GO:2000648 |                  | GO:0008283         |                  |
| gene                      | Expression by T3 | gene                                                                            | Expression by T3 | gene               | Expression by T3 |
| pglyrp1                   | up               | clu                                                                             | up               | ins                | up               |
| camk2a                    | up               | shh                                                                             | up               | plk1               | up               |
| inhbc.1                   | up               | nusap1                                                                          | up               | top2a              | up               |
| ins                       | up               | cdk1                                                                            | up               | melk               | up               |
| nptx1                     | up               | smarca4                                                                         | up               | cdk1               | up               |
| plk1                      | up               | mmp2                                                                            | up               | pdx1               | up               |
| top2a                     | up               | mecom                                                                           | up               | bub1               | up               |
| melk                      | up               | anxa6                                                                           | up               | smarca4            | up               |
| ckap2                     | up               | snai1                                                                           | up               | aurkb              | up               |
| cdk1                      | up               | bmp5                                                                            | up               | arnt2              | up               |
| pdx1                      | up               | tbx1                                                                            | up               | mmp2               | up               |
| hyal2                     | up               | pdgfra                                                                          | up               | dio3               | up               |
| ect2                      | up               | spi1                                                                            | up               | robo1              | up               |
| bub1                      | up               | pak3                                                                            | up               | bin1               | up               |
| aurka                     | up               | edn1                                                                            | up               | gli2               | up               |
| smarca4                   | up               | fancd2                                                                          | up               | casr               | up               |
| aurkb                     | up               | fn1                                                                             | up               | mecom              | up               |
| fam72a                    | up               | sept4                                                                           | up               | ntf3               | up               |
| cit                       | up               | fgf10                                                                           | up               | cntfr              | up               |
| cidea                     | up               | nrp1                                                                            | up               | clu                | up               |
| arnt2                     | up               | efnb1                                                                           | up               | tpx2               | up               |
| mmp2                      | up               | racgap1                                                                         | up               | shc4               | up               |
| esco2                     | up               | cyp26a1                                                                         | up               | ets1               | up               |
| dio3                      | up               | PRDM16                                                                          | up               | lmna               | up               |
| espl1                     | up               | homer3                                                                          | up               | bub1b              | up               |
| robo1                     | up               | runx1                                                                           | up               | bmp5               | up               |
| bin1                      | up               | cdh2                                                                            | up               | myc                | up               |
| birc5.2                   | up               | sema3f                                                                          | up               | naca               | up               |
| mad2l1                    | up               | numbl                                                                           | up               | hpgd               | up               |
| olfm4                     | up               | mmp24                                                                           | up               | tbx1               | up               |
| mtfr2                     | up               | notch3                                                                          | up               | tf                 | up               |
| gli2                      | up               | tfec                                                                            | up               | pdgfra             | up               |
| casr                      | up               | jmjd1c                                                                          | up               | bmp6               | up               |
| fgb                       | up               | ltbp3                                                                           | up               | ikzf3              | up               |
| epha4                     | up               | loxl2                                                                           | up               | nox4               | up               |
| itga5                     | up               | rcc2                                                                            | up               | cdh13              | up               |
| hic1                      | up               | nde1                                                                            | up               | tgm2               | up               |
| mecom                     | up               | vangl2                                                                          | up               | rara               | up               |
| ntf3                      | up               | nrp2                                                                            | up               | cdk5r1             | up               |
| DPF1                      | up               | masp1                                                                           | up               | lck                | up               |
| anxa6                     | up               | sall1                                                                           | up               | INHBA              | up               |
| mal                       | up               | pim1                                                                            | down             | traip              | up               |
| cntfr                     | up               | hnf1b                                                                           | down             | pak3               | up               |
| epha3                     | up               | rel                                                                             | down             | edn1               | up               |
| clu                       | up               | fgf19                                                                           | down             | nckap1l            | up               |
| gas2                      | up               | sema3c                                                                          | down             | jak3               | up               |
| tpx2                      | up               | zcchc11                                                                         | down             | stil               | up               |
| shc4                      | up               | dhrs9                                                                           | down             | mcm2               | up               |
| ets1                      | up               |                                                                                 |                  | itga4              | up               |
| lmna                      | up               |                                                                                 |                  | ell3               | up               |
| bub1b                     | up               |                                                                                 |                  | igf1r              | up               |
| pdia2                     | up               |                                                                                 |                  | tgfb2              | up               |
| ephb3                     | up               |                                                                                 |                  | cldn7              | up               |
| efhc1                     | up               |                                                                                 |                  | runx3              | up               |
| acvr1b                    | up               |                                                                                 |                  | smad3              | up               |

|          |    |  |          |    |
|----------|----|--|----------|----|
| snai1    | up |  | fn1      | up |
| bmp5     | up |  | itga1    | up |
| prkcb    | up |  | cxcr4    | up |
| znf385a  | up |  | nox5     | up |
| myc      | up |  | foxe1    | up |
| scml2    | up |  | ror2     | up |
| naca     | up |  | coro1a   | up |
| nkx3-2   | up |  | fgf10    | up |
| hpgd     | up |  | sulf1    | up |
| tbx1     | up |  | agap2    | up |
| tf       | up |  | il6st    | up |
| pdgfra   | up |  | PLAC8    | up |
| lgals1   | up |  | shh      | up |
| bmp6     | up |  | tsc22d1  | up |
| ikzf3    | up |  | hey2     | up |
| pde1b    | up |  | nrp1     | up |
| nox4     | up |  | cd74     | up |
| cdh13    | up |  | igfbp5   | up |
| bnip3    | up |  | htra1    | up |
| tgm2     | up |  | cthrcl   | up |
| spi1     | up |  | fabp6    | up |
| proc     | up |  | fam83d   | up |
| rara     | up |  | ccnb2    | up |
| cdk5r1   | up |  | prc1     | up |
| fabp1    | up |  | ccnb3    | up |
| lsp1     | up |  | e2f8     | up |
| aplp1    | up |  | dpt      | up |
| lck      | up |  | tspan1   | up |
| prex1    | up |  | iqgap3   | up |
| alb      | up |  | cdc20    | up |
| INHBA    | up |  | lgi1     | up |
| nme5     | up |  | wfdc1    | up |
| cbx4     | up |  | cks1b    | up |
| traip    | up |  | shcbp1   | up |
| pak3     | up |  | dlgap5   | up |
| dnmt3a   | up |  | efnb1    | up |
| edn1     | up |  | racgap1  | up |
| aldoc    | up |  | mmp16    | up |
| nckap1l  | up |  | cks2     | up |
| mag      | up |  | fabp7    | up |
| jak3     | up |  | kif2c    | up |
| nme4     | up |  | ccna2    | up |
| apex1    | up |  | tacc3    | up |
| stil     | up |  | adam33   | up |
| stk10    | up |  | cenpf    | up |
| mcm2     | up |  | ncapg2   | up |
| itga4    | up |  | ccnf     | up |
| ell3     | up |  | PRDM16   | up |
| fancd2   | up |  | foxm1    | up |
| igflr    | up |  | ttk      | up |
| tnfrsf19 | up |  | CUZD1    | up |
| tgfb2    | up |  | kif15    | up |
| cldn7    | up |  | ezh2     | up |
| slc30a10 | up |  | tacr1    | up |
| insrr    | up |  | ppp1r16b | up |
| runx3    | up |  | KIF20B   | up |
| pim3     | up |  | mmp14    | up |
| gbp4     | up |  | vash1    | up |
| smad3    | up |  | DCHS1    | up |
| dnase1l3 | up |  | runx1    | up |
| fn1      | up |  | mycn     | up |
| smpd2    | up |  | pgc      | up |

|          |      |  |  |          |    |
|----------|------|--|--|----------|----|
| itga1    | up   |  |  | cdc25c   | up |
| slc25a4  | up   |  |  | ptch1    | up |
| cxcr4    | up   |  |  | fscn1    | up |
| nox5     | up   |  |  | gcnt2    | up |
| psme3    | up   |  |  | uchl1    | up |
| foxe1    | up   |  |  | gnrhr    | up |
| sept4    | up   |  |  | recql4   | up |
| ror2     | up   |  |  | hspg2    | up |
| coro1a   | up   |  |  | igfbp4   | up |
| gbp3     | up   |  |  | col8a1   | up |
| fgf10    | up   |  |  | avpr2    | up |
| sulf1    | up   |  |  | c18orf54 | up |
| agap2    | up   |  |  | cdh2     | up |
| il6st    | up   |  |  | ift122   | up |
| LATS1    | up   |  |  | myh10    | up |
| mdk      | up   |  |  | ccne2    | up |
| PLAC8    | up   |  |  | NCAM1    | up |
| rybp     | up   |  |  | numbl    | up |
| shh      | up   |  |  | erg      | up |
| cecr2    | up   |  |  | il12rb2  | up |
| tsc22d1  | up   |  |  | grhl2    | up |
| hey2     | up   |  |  | lmo2     | up |
| nrp1     | up   |  |  | s1pr2    | up |
| cd74     | up   |  |  | slc11a1  | up |
| nfatc4   | up   |  |  | sparc    | up |
| hspa1b   | down |  |  | adamts8  | up |
| hsp70    | down |  |  | tac1     | up |
| dusp1    | down |  |  | fgr      | up |
| zc3h12a  | down |  |  | zbtb7c   | up |
| socs2    | down |  |  | bambi    | up |
| pdk4     | down |  |  | uts2r    | up |
| atoh1    | down |  |  | fam98b   | up |
| srpk2    | down |  |  | nkx6-1   | up |
| tsc22d3  | down |  |  | notch3   | up |
| crip1    | down |  |  | has2     | up |
| dusp6    | down |  |  | tk1      | up |
| gadd45g  | down |  |  | foxj1    | up |
| fgfr4    | down |  |  | tfec     | up |
| tnip2    | down |  |  | bnc1     | up |
| znf385b  | down |  |  | ltbp3    | up |
| gltscr2  | down |  |  | ccnd1    | up |
| ddit3    | down |  |  | loxl2    | up |
| pim1     | down |  |  | timp2    | up |
| ppt1     | down |  |  | lexm     | up |
| aifm3    | down |  |  | intu     | up |
| myb      | down |  |  | ptafr    | up |
| gclc     | down |  |  | gpc1     | up |
| tnfsf15  | down |  |  | gjc2     | up |
| prodh    | down |  |  | cyp7b1   | up |
| dapk2    | down |  |  | mfge8    | up |
| gelm     | down |  |  | chd5     | up |
| mknk2    | down |  |  | agtr1    | up |
| plk3     | down |  |  | fer      | up |
| txnip    | down |  |  | nde1     | up |
| rrn3     | down |  |  | ccdc88a  | up |
| irak2    | down |  |  | sdc3     | up |
| sqstm1   | down |  |  | prdm1    | up |
| eth      | down |  |  | fndc3b   | up |
| zfp36    | down |  |  | CD79A    | up |
| ip6k2    | down |  |  | nrarp    | up |
| siva1    | down |  |  | nrp2     | up |
| traf3ip2 | down |  |  | kcnk2    | up |

|          |      |  |  |         |      |
|----------|------|--|--|---------|------|
| vav2     | down |  |  | srgap2  | up   |
| rps6     | down |  |  | per2    | up   |
| cdca7    | down |  |  | pla2g1b | up   |
| pnf      | down |  |  | sall1   | up   |
| rps7     | down |  |  | e4f1    | up   |
| rpl11    | down |  |  | WNK2    | up   |
| hnf1b    | down |  |  | hpse2   | up   |
| atr      | down |  |  | npr3    | up   |
| ppp1r13b | down |  |  | ptpru   | up   |
| dhcr24   | down |  |  | dixdc1  | up   |
| rbm25    | down |  |  | ing1    | up   |
| egr1     | down |  |  | il11ra  | up   |
| znf622   | down |  |  | ptprk   | up   |
| hells    | down |  |  | ogn     | up   |
| sod1     | down |  |  | hsa1b   | down |
| rps27a   | down |  |  | dusp1   | down |
| lrrc14b  | down |  |  | srpk2   | down |
| rps19    | down |  |  | crip1   | down |
| tgfa     | down |  |  | fgfr4   | down |
| rel      | down |  |  | pim1    | down |
| rpl26    | down |  |  | myb     | down |
| ccnd2    | down |  |  | txnip   | down |
| pcsk9    | down |  |  | rrn3    | down |
| ogt      | down |  |  | cth     | down |
| rps3     | down |  |  | zfp36   | down |
| rpl14    | down |  |  | rps6    | down |
| trim2    | down |  |  | cdca7   | down |
| birc7    | down |  |  | pnf     | down |
| kmt2a    | down |  |  | hnf1b   | down |
| nfkbia   | down |  |  | dhcr24  | down |
| jade1    | down |  |  | egr1    | down |
|          |      |  |  | hells   | down |
|          |      |  |  | lrrc14b | down |
|          |      |  |  | tgfa    | down |
|          |      |  |  | rel     | down |
|          |      |  |  | ccnd2   | down |
|          |      |  |  | rps3    | down |
|          |      |  |  | birc7   | down |
|          |      |  |  | kmt2a   | down |
|          |      |  |  | nfkbia  | down |
|          |      |  |  | pth1r   | down |
|          |      |  |  | fgfbp1  | down |
|          |      |  |  | fgf19   | down |
|          |      |  |  | wnt16   | down |
|          |      |  |  | zp4     | down |
|          |      |  |  | nccrp1  | down |
|          |      |  |  | ctbp2   | down |
|          |      |  |  | ereg    | down |
|          |      |  |  | uspl1   | down |
|          |      |  |  | mbd2    | down |
|          |      |  |  | cnbp    | down |
|          |      |  |  | gtpbp4  | down |
|          |      |  |  | rps9    | down |
|          |      |  |  | eppk1   | down |
|          |      |  |  | cpo     | down |
|          |      |  |  | hdac6   | down |
|          |      |  |  | rpl23   | down |
|          |      |  |  | ercc1   | down |
|          |      |  |  | enpep   | down |
|          |      |  |  | pyy     | down |
|          |      |  |  | rps15a  | down |
|          |      |  |  | rpl29   | down |

|  |  |  |  |        |      |
|--|--|--|--|--------|------|
|  |  |  |  | pinx1  | down |
|  |  |  |  | insig1 | down |
|  |  |  |  | fpgs   | down |
|  |  |  |  | errfi1 | down |
|  |  |  |  | PES1   | down |
|  |  |  |  | dnaja2 | down |
|  |  |  |  | penk   | down |
|  |  |  |  | rps27  | down |
|  |  |  |  | cdc7   | down |
|  |  |  |  | eif4b  | down |
