# Supplementary material
Source: PubMed Central journal article supplement (PMC7840310)
Supplement: Supp_Table5.pdf [file Supp_Table5.pdf]

Supplemental Table 5. Most significant GO terms enriched among genes regulated by Trk

| No  | GO ID      | Term                                                                                     | Count | P value | Benjamini | FDR    |
|-----|------------|------------------------------------------------------------------------------------------|-------|---------|-----------|--------|
| 1   | GO:0614    | SRP-dependent cotranslational protein targeting to membrane                              | 45    | <0.001  | <0.001    | <0.001 |
| 2   | GO:19033   | viral transcription                                                                      | 47    | <0.001  | <0.001    | <0.001 |
| 3   | GO:06413   | translational initiation                                                                 | 51    | <0.001  | <0.001    | <0.001 |
| 4   | GO:184     | nuclear-transcribed mRNA catabolic process, nonsense-mediated decay                      | 45    | <0.001  | <0.001    | <0.001 |
| 5   | GO:0412    | translation                                                                              | 60    | <0.001  | <0.001    | <0.001 |
| 6   | GO:0364    | RNA processing                                                                           | 53    | <0.001  | <0.001    | <0.001 |
| 7   | GO:1301    | cell division                                                                            | 71    | <0.001  | <0.001    | <0.001 |
| 8   | GO:0813    | flavonoid biosynthetic process                                                           | 14    | <0.001  | <0.001    | <0.001 |
| 9   | GO:7067    | mitotic nuclear division                                                                 | 54    | <0.001  | <0.001    | <0.001 |
| 10  | GO:3524    | collagen catabolic process                                                               | 39    | <0.001  | <0.001    | <0.001 |
| 11  | GO:7155    | cell adhesion                                                                            | 81    | <0.001  | <0.001    | <0.001 |
| 12  | GO:52696   | flavonoid glucuronidation                                                                | 14    | <0.001  | <0.001    | <0.001 |
| 13  | GO:7092    | sister chromatid cohesion                                                                | 14    | <0.001  | <0.001    | <0.001 |
| 14  | GO:2227    | innate immune response in mucosa                                                         | 14    | <0.001  | <0.001    | <0.001 |
| 15  | GO:30196   | extracellular matrix organization                                                        | 41    | <0.001  | <0.001    | <0.001 |
| 16  | GO:30199   | collagen fibril organization                                                             | 16    | <0.001  | <0.001    | <0.001 |
| 17  | GO:52695   | cellular glucuronidation                                                                 | 10    | <0.001  | <0.001    | 0.004  |
| 18  | GO:2181    | cytoplasmic translation                                                                  | 12    | <0.001  | <0.001    | 0.006  |
| 19  | GO:19743   | antibacterial humoral response                                                           | 15    | <0.001  | 0.003     | 0.028  |
| 20  | GO:19433   | triglyceride catabolic process                                                           | 11    | <0.001  | 0.006     | 0.050  |
| 21  | GO:6905    | xenobiotic metabolic process                                                             | 20    | <0.001  | 0.007     | 0.067  |
| 22  | GO:56933   | defense response to Gram-positive bacterium                                              | 21    | <0.001  | 0.007     | 0.072  |
| 23  | GO:35687   | endodermal cell differentiation                                                          | 11    | <0.001  | 0.011     | 0.109  |
| 24  | GO:7018    | microtubule-based movement                                                               | 20    | <0.001  | 0.011     | 0.116  |
| 25  | GO:22811   | extracellular matrix disassembly                                                         | 19    | <0.001  | 0.014     | 0.158  |
| 26  | GO:42493   | response to drug                                                                         | 48    | <0.001  | 0.018     | 0.208  |
| 27  | GO:9235    | cobalamin metabolic process                                                              | 9     | <0.001  | 0.040     | 0.483  |
| 28  | GO:7411    | axon guidance                                                                            | 29    | <0.001  | 0.047     | 0.584  |
| 29  | GO:8283    | cell proliferation                                                                       | 53    | <0.001  | 0.061     | 0.791  |
| 30  | GO:55114   | oxidation-reduction process                                                              | 77    | <0.001  | 0.080     | 1.085  |
| 31  | GO:86      | G2M transition of mitotic cell cycle                                                     | 25    | <0.001  | 0.114     | 1.630  |
| 32  | GO:7019    | microtubule depolymerization                                                             | 6     | <0.001  | 0.116     | 1.709  |
| 33  | GO:42355   | L-turcose catabolic process                                                              | 6     | <0.001  | 0.116     | 1.709  |
| 34  | GO:7380    | mitotic metaphase plate congression                                                      | 11    | 0.001   | 0.128     | 1.984  |
| 35  | GO:36065   | lucosylation                                                                             | 6     | 0.002   | 0.179     | 2.850  |
| 36  | GO:46777   | protein autophosphorylation                                                              | 28    | 0.002   | 0.250     | 4.319  |
| 37  | GO:51310   | metaphase plate congression                                                              | 6     | 0.002   | 0.256     | 4.538  |
| 38  | GO:6534    | cysteine metabolic process                                                               | 4     | 0.003   | 0.257     | 4.699  |
| 39  | GO:910     | cytokinesis                                                                              | 12    | 0.003   | 0.254     | 4.757  |
| 40  | GO:3193    | mitotic cytokinesis                                                                      | 9     | 0.003   | 0.271     | 5.264  |
| 41  | GO:97421   | liver regeneration                                                                       | 9     | 0.003   | 0.271     | 5.264  |
| 42  | GO:6024    | glycosaminoglycan biosynthetic process                                                   | 11    | 0.003   | 0.273     | 5.438  |
| 43  | GO:7586    | digestion                                                                                | 14    | 0.003   | 0.269     | 5.477  |
| 44  | GO:1922    | kidney development                                                                       | 17    | 0.003   | 0.281     | 5.687  |
| 45  | GO:82      | G1/S transition of mitotic cell cycle                                                    | 19    | 0.003   | 0.286     | 6.150  |
| 46  | GO:8202    | steroid metabolic process                                                                | 11    | 0.004   | 0.294     | 6.501  |
| 47  | GO:6334    | nucleosome assembly                                                                      | 21    | 0.004   | 0.289     | 6.744  |
| 48  | GO:1558    | regulation of cell growth                                                                | 16    | 0.004   | 0.309     | 7.174  |
| 49  | GO:6508    | proteolysis                                                                              | 63    | 0.004   | 0.310     | 7.350  |
| 50  | GO:1591    | skeletal system development                                                              | 23    | 0.004   | 0.319     | 7.758  |
| 51  | GO:28      | ribosomal small subunit assembly                                                         | 7     | 0.005   | 0.334     | 8.359  |
| 52  | GO:9116    | nucleoside metabolic process                                                             | 7     | 0.005   | 0.334     | 8.359  |
| 53  | GO:70      | mitotic sister chromatid segregation                                                     | 8     | 0.005   | 0.338     | 8.692  |
| 54  | GO:42273   | ribosomal large subunit biogenesis                                                       | 6     | 0.005   | 0.336     | 8.592  |
| 55  | GO:31110   | regulation of microtubule polymerization or depolymerization                             | 5     | 0.005   | 0.360     | 9.486  |
| 56  | GO:31638   | cytokine activation                                                                      | 5     | 0.005   | 0.360     | 9.486  |
| 57  | GO:71243   | cellular response to arsenic-containing substance                                        | 5     | 0.005   | 0.360     | 9.486  |
| 58  | GO:32355   | response to estradiol                                                                    | 17    | 0.006   | 0.377     | 10.228 |
| 59  | GO:7299    | chromosome segregation                                                                   | 14    | 0.006   | 0.382     | 10.589 |
| 60  | GO:8152    | metabolic process                                                                        | 26    | 0.007   | 0.414     | 11.892 |
| 61  | GO:7076    | mitotic chromosome condensation                                                          | 6     | 0.008   | 0.444     | 13.215 |
| 62  | GO:9165    | nucleic acid biosynthetic process                                                        | 6     | 0.008   | 0.444     | 13.215 |
| 63  | GO:42026   | protein refolding                                                                        | 6     | 0.008   | 0.444     | 13.215 |
| 64  | GO:31089   | hair follicle morphogenesis                                                              | 8     | 0.008   | 0.440     | 13.258 |
| 65  | GO:51815   | ventricular cardiac muscle cell development                                              | 6     | 0.008   | 0.462     | 14.343 |
| 66  | GO:34501   | protein localization to kinetochore                                                      | 5     | 0.008   | 0.462     | 14.343 |
| 67  | GO:32526   | response to retinoic acid                                                                | 10    | 0.008   | 0.481     | 14.537 |
| 68  | GO:31393   | negative regulation of protein ubiquitination                                            | 10    | 0.008   | 0.481     | 14.537 |
| 69  | GO:6749    | glutathione metabolic process                                                            | 12    | 0.009   | 0.478     | 15.481 |
| 70  | GO:16477   | cell migration                                                                           | 26    | 0.009   | 0.476     | 15.648 |
| 71  | GO:70301   | cellular response to hydrogen peroxide                                                   | 12    | 0.010   | 0.513     | 17.488 |
| 72  | GO:5975    | carbohydrate metabolic process                                                           | 26    | 0.010   | 0.514     | 17.815 |
| 73  | GO:19800   | peptide cross-linking via chondroitin 4-sulfate glycosaminoglycan                        | 4     | 0.011   | 0.534     | 19.021 |
| 74  | GO:38963   | collagen-activated tyrosine kinase receptor signaling pathway                            | 4     | 0.011   | 0.534     | 19.021 |
| 75  | GO:32873   | negative regulation of stress-activated MAPK cascade                                     | 4     | 0.011   | 0.534     | 19.021 |
| 76  | GO:187     | activation of MAPK activity                                                              | 18    | 0.012   | 0.565     | 20.858 |
| 77  | GO:51728   | regulation of cell cycle                                                                 | 20    | 0.012   | 0.561     | 20.858 |
| 78  | GO:21915   | neural tube development                                                                  | 8     | 0.014   | 0.592     | 22.837 |
| 79  | GO:45786   | negative regulation of cell cycle                                                        | 9     | 0.014   | 0.588     | 22.915 |
| 80  | GO:59102   | cochlea development                                                                      | 7     | 0.016   | 0.651     | 25.786 |
| 81  | GO:6695    | cholesterol biosynthetic process                                                         | 9     | 0.016   | 0.635     | 26.302 |
| 82  | GO:16042   | lipid catabolic process                                                                  | 15    | 0.016   | 0.635     | 26.620 |
| 83  | GO:46046   | axon extension involved in axon guidance                                                 | 5     | 0.017   | 0.640     | 27.216 |
| 84  | GO:43616   | keratinocyte proliferation                                                               | 5     | 0.017   | 0.640     | 27.216 |
| 85  | GO:30705   | cytoskeleton-dependent intracellular transport                                           | 6     | 0.017   | 0.643     | 27.774 |
| 86  | GO:60651   | smoothened signaling pathway involved in dorsal/ventral neural tube patterning           | 4     | 0.018   | 0.661     | 29.277 |
| 87  | GO:51782   | negative regulation of cell division                                                     | 4     | 0.018   | 0.661     | 29.277 |
| 88  | GO:60428   | lung epithelium development                                                              | 4     | 0.018   | 0.661     | 29.277 |
| 89  | GO:48146   | positive regulation of fibroblast proliferation                                          | 11    | 0.018   | 0.659     | 29.480 |
| 90  | GO:7030    | mitotic cell cycle checkpoint                                                            | 9     | 0.019   | 0.674     | 30.819 |
| 91  | GO:9611    | response to wounding                                                                     | 12    | 0.021   | 0.697     | 32.835 |
| 92  | GO:7348    | regulation of mitotic cell cycle                                                         | 9     | 0.022   | 0.705     | 33.748 |
| 93  | GO:70295   | renal water absorption                                                                   | 3     | 0.022   | 0.704     | 34.063 |
| 94  | GO:15732   | prostaglandin transport                                                                  | 3     | 0.022   | 0.704     | 34.063 |
| 95  | GO:6968    | tryptophan metabolic process                                                             | 3     | 0.022   | 0.704     | 34.063 |
| 96  | GO:21513   | axonal cord dorsoventral patterning                                                      | 3     | 0.022   | 0.704     | 34.063 |
| 97  | GO:1503    | ossification                                                                             | 14    | 0.022   | 0.707     | 34.660 |
| 98  | GO:42060   | wound healing                                                                            | 14    | 0.022   | 0.707     | 34.660 |
| 99  | GO:15972   | lipogenesis pathway                                                                      | 5     | 0.023   | 0.705     | 34.863 |
| 100 | GO:8312    | mitotic recombination                                                                    | 5     | 0.023   | 0.705     | 34.863 |
| 101 | GO:59872   | white fat cell differentiation                                                           | 5     | 0.023   | 0.705     | 34.863 |
| 102 | GO:6810    | transcript                                                                               | 43    | 0.028   | 0.724     | 39.735 |
| 103 | GO:6468    | protein phosphorylation                                                                  | 54    | 0.024   | 0.723     | 39.656 |
| 104 | GO:7605    | sensory perception of sound                                                              | 20    | 0.025   | 0.723     | 37.342 |
| 105 | GO:51394   | response to glucocorticoid                                                               | 12    | 0.026   | 0.728     | 39.985 |
| 106 | GO:43588   | skin development                                                                         | 8     | 0.027   | 0.743     | 39.763 |
| 107 | GO:19370   | leukotriene biosynthetic process                                                         | 6     | 0.027   | 0.742     | 39.993 |
| 108 | GO:6801    | superoxide metabolic process                                                             | 6     | 0.027   | 0.742     | 39.993 |
| 109 | GO:7094    | mitotic spindle assembly checkpoint                                                      | 6     | 0.027   | 0.742     | 39.993 |
| 110 | GO:15889   | cobalamin transport                                                                      | 4     | 0.027   | 0.745     | 40.590 |
| 111 | GO:51256   | mitotic spindle midzone assembly                                                         | 4     | 0.027   | 0.745     | 40.590 |
| 112 | GO:45740   | positive regulation of DNA replication                                                   | 9     | 0.029   | 0.755     | 41.879 |
| 113 | GO:70208   | protein heterodimerization                                                               | 5     | 0.030   | 0.762     | 42.941 |
| 114 | GO:6841    | triglyceride metabolic process                                                           | 8     | 0.031   | 0.775     | 44.465 |
| 115 | GO:1890    | placenta development                                                                     | 8     | 0.031   | 0.775     | 44.465 |
| 116 | GO:6865    | amino acid transport                                                                     | 8     | 0.031   | 0.775     | 44.465 |
| 117 | GO:9612    | response to mechanical stimulus                                                          | 11    | 0.033   | 0.789     | 46.253 |
| 118 | GO:1569    | patterning of blood vessels                                                              | 7     | 0.033   | 0.786     | 46.278 |
| 119 | GO:27      | ribosomal large subunit assembly                                                         | 6     | 0.033   | 0.784     | 46.465 |
| 120 | GO:9630    | response to toxic substance                                                              | 14    | 0.038   | 0.835     | 48.804 |
| 121 | GO:30177   | positive regulation of Wnt signaling pathway                                             | 8     | 0.036   | 0.804     | 49.238 |
| 122 | GO:6879    | cellular iron ion homeostasis                                                            | 9     | 0.037   | 0.811     | 50.375 |
| 123 | GO:1643    | neural tube closure                                                                      | 13    | 0.037   | 0.809     | 50.344 |
| 124 | GO:15671   | oxygen transport                                                                         | 5     | 0.038   | 0.811     | 51.128 |
| 125 | GO:30214   | hyaluronan catabolic process                                                             | 5     | 0.038   | 0.811     | 51.128 |
| 126 | GO:46006   | platelet-derived growth factor receptor signaling pathway                                | 7     | 0.038   | 0.813     | 51.759 |
| 127 | GO:45922   | negative regulation of fatty acid metabolic process                                      | 4     | 0.039   | 0.813     | 52.042 |
| 128 | GO:52897   | xenobiotic glucuronidation                                                               | 4     | 0.039   | 0.813     | 52.042 |
| 129 | GO:7614    | short-term memory                                                                        | 4     | 0.039   | 0.813     | 52.042 |
| 130 | GO:463     | maturation of LSU-rRNA from tricistronic rRNA transcript (SSU-rRNA, 5.8S rRNA, LSU-rRNA) | 4     | 0.039   | 0.813     | 52.042 |
| 131 | GO:1502    | cartilage condensation                                                                   | 6     | 0.040   | 0.818     | 52.963 |
| 132 | GO:43667   | post-translational protein modification                                                  | 6     | 0.040   | 0.818     | 52.963 |
| 133 | GO:23157   | spindle checkpoint                                                                       | 3     | 0.041   | 0.830     | 54.715 |
| 134 | GO:51409   | response to nitrosative stress                                                           | 3     | 0.041   | 0.830     | 54.715 |
| 135 | GO:70370   | cellular heat acclimation                                                                | 3     | 0.041   | 0.830     | 54.715 |
| 136 | GO:97490   | sympathetic neuron projection extension                                                  | 3     | 0.041   | 0.830     | 54.715 |
| 137 | GO:7000    | nucleus organization                                                                     | 3     | 0.041   | 0.830     | 54.715 |
| 138 | GO:90521   | glomerular visceral epithelial cell migration                                            | 3     | 0.041   | 0.830     | 54.715 |
| 139 | GO:97491   | sympathetic neuron projection guidance                                                   | 3     | 0.041   | 0.830     | 54.715 |
| 140 | GO:1902285 | semaphorin-plexin signaling pathway involved in neuron projection guidance               | 3     | 0.041   | 0.830     | 54.715 |
| 141 | GO:45907   | regulation of auditory receptor cell differentiation                                     | 3     | 0.041   | 0.830     | 54.715 |
| 142 | GO:329     | re-entry into mitotic cell cycle                                                         | 3     | 0.041   | 0.830     | 54.715 |
| 143 | GO:2001205 | negative regulation of osteoclast development                                            | 3     | 0.041   | 0.830     | 54.715 |
| 144 | GO:44331   | cell-cell adhesion mediated by cadherins                                                 | 3     | 0.041   | 0.830     | 54.715 |
| 145 | GO:36498   | ventral trunk neural crest cell migration                                                | 3     | 0.041   | 0.830     | 54.715 |
| 146 | GO:9582    | detection of abiotic stimulus                                                            | 3     | 0.041   | 0.830     | 54.715 |
| 147 | GO:44752   | response to human chorionic gonadotropin                                                 | 3     | 0.041   | 0.830     | 54.715 |
| 148 | GO:69395   | SMAD protein signal transduction                                                         | 11    | 0.044   | 0.845     | 56.861 |
| 149 | GO:7652    | mitotic spindle organization                                                             | 7     | 0.044   | 0.844     | 57.184 |
| 150 | GO:6730    | one-carbon metabolic process                                                             | 7     | 0.044   | 0.844     | 57.184 |
| 151 | GO:42384   | clathrin assembly                                                                        | 18    | 0.045   | 0.848     | 58.052 |
| 152 | GO:42157   | lipoprotein metabolic process                                                            | 8     | 0.046   | 0.851     | 58.729 |
| 153 | GO:7051    | spindle organization                                                                     | 5     | 0.047   | 0.851     | 59.098 |
| 154 | GO:6309    | androgen metabolic process                                                               | 5     | 0.047   | 0.851     | 59.098 |
| 155 | GO:42274   | ribosomal small subunit biogenesis                                                       | 5     | 0.047   | 0.851     | 59.098 |
| 156 | GO:48666   | embryonic digestive tract development                                                    | 5     | 0.047   | 0.851     | 59.098 |
| 157 | GO:45754   | branching morphogenesis of an epithelial tube                                            | 4     | 0.047   | 0.850     | 59.324 |
| 158 | GO:83      | regulation of transcription involved in G1/S transition of mitotic cell cycle            | 6     | 0.047   | 0.850     | 59.324 |
| 159 | GO:51439   | regulation of ubiquitin-protein ligase activity involved in mitotic cell cycle           | 6     | 0.047   | 0.850     | 59.324 |
| 160 | GO:2352    | sodium-independent organic anion transport                                               | 6     | 0.047   | 0.850     | 59.324 |
| 161 | GO:7399    | nervous system development                                                               | 35    | 0.048   | 0.854     | 60.113 |
